# Excitation-inhibition imbalance in Alzheimer's disease using multiscale neural model inversion of resting-state fMRI

Guoshi Li<sup>1,2</sup>, Li-Ming Hsu<sup>1,2,3</sup>, Ye Wu<sup>1,2</sup>, Andrea C Bozoki<sup>4</sup>, Yen-Yu Ian Shih<sup>2,3,4</sup>, Pew-Thian Yap<sup>1,2</sup>\*

<sup>1</sup> Department of Radiology  
University of North Carolina  
Chapel Hill, NC USA

<sup>2</sup> Biomedical Research Imaging Center  
University of North Carolina  
Chapel Hill, NC USA

<sup>3</sup> Center for Animal MRI  
University of North Carolina  
Chapel Hill, NC, USA.

<sup>4</sup> Department of Neurology  
University of North Carolina  
Chapel Hill, NC, USA

\*Correspondence: [ptyap@med.unc.edu](mailto:ptyap@med.unc.edu)

## 1 **Abstract**

2 Alzheimer's disease (AD) is a serious neurodegenerative disorder without a clear understanding of the etiology  
3 and pathophysiology. Recent experimental data has suggested neuronal excitation-inhibition (E-I) imbalance as  
4 an essential element and critical regulator of AD pathology, but E-I imbalance has not been systematically  
5 mapped out for either local or large-scale neuronal circuits in AD. By applying a Multiscale Neural Model  
6 Inversion (MNMI) framework to the resting-state functional MRI (rs-fMRI) data from the Alzheimer's Disease  
7 Neuroimaging Initiative (ADNI), we identified brain regions with disrupted E-I balance based on impaired  
8 mesoscale excitatory and inhibitory connection strengths in a large network during AD progression. We  
9 observed that both intra-regional and inter-regional E-I balance is progressively disrupted from cognitively  
10 normal individuals, to mild cognitive impairment (MCI) and to AD, and E-I difference (or ratio) can be  
11 abnormally increased or decreased, depending on specific region. Also, we found that (local) inhibitory  
12 connections are more significantly impaired than excitatory ones and the strengths of the majority of  
13 connections are reduced in MCI and AD, leading to gradual decoupling of neural populations. Moreover, we  
14 revealed a core AD network comprised mainly of limbic and cingulate regions including the hippocampus,  
15 pallidum, putamen, nucleus accumbens, inferior temporal cortex and caudal anterior cingulate cortex (cACC).  
16 These brain regions exhibit consistent and stable E-I alterations across MCI and AD, and thus may represent  
17 early AD biomarkers and important therapeutic targets. Lastly, the E-I difference (or ratio) of multiple brain  
18 regions (precuneus, posterior cingulate cortex, pallium, cACC, putamen and hippocampus) was found to be  
19 significantly correlated with the Mini-Mental State Examination (MMSE) score, indicating that the degree of E-  
20 I impairment is behaviorally related to MCI/AD cognitive performance. Overall, our study constitutes the first  
21 attempt to delineate E-I imbalance in large-scale neuronal circuits during AD progression, which may facilitate  
22 the development of new treatment paradigms to restore pathological E-I balance in AD.

23  
24  
25  
26

## 27 **Introduction**

28 Alzheimer's disease (AD) is neurodegenerative disorder characterized by progressive and irreversible cognitive  
29 decline ([Bateman et al., 2012](#)). It is the leading cause of dementia affecting more than 47 million people  
30 worldwide and this number is expected to increase to 131 million by 2050 ([Tiwari et al., 2019](#)). The healthcare  
31 cost for patients with AD and other dementias is enormous and is estimated to be 236 billion in the US for 2016  
32 alone and predicted to quadruple by 2050 ([Alzheimer's Association, 2016](#)). Despite decades of extensive  
33 research, a clear understanding of the etiology and pathophysiology of AD remains elusive. Current treatments  
34 are only symptomatic without slowing down the progression of the disease ([Aldehri et al., 2018](#)). The lack of  
35 effective treatment highlights the paramount importance of identifying new pathophysiological and therapeutic  
36 targets ([Thakur et al., 2018](#)).

37 Excitation-inhibition (E-I) balance represents a promising pathophysiological and therapeutic target for  
38 AD. First, disrupted E-I balance may underlie the key pathophysiological mechanism of AD. One of the  
39 pathological hallmarks of AD is the accumulation of amyloid- $\beta$  ( $A\beta$ ) peptides in the brain that occurs long  
40 before clinical disease onset ([Karran et al., 2011](#); [Huang and Mucke, 2012](#)). During this long extended  
41 preclinical stage, soluble  $A\beta$  oligomers and amyloid plaques disrupt neuronal circuit activity and function by  
42 altering synaptic transmission and E-I balance leading to cognitive malfunction ([Palop and Mucke, 2010](#);  
43 [Busche and Konnerth, 2016](#); [Palop and Mucke, 2016](#)). In particular, high  $A\beta$  levels elicit epileptiform  
44 discharges and non-convulsive seizures in both hippocampal and neocortical networks of human amyloid  
45 precursor protein (hAPP) transgenic mice ([Palop et al., 2007](#)), which closely relates to the increased incidence  
46 of epileptic seizures in AD patients ([Palop and Mucke, 2009](#)). Second, E-I disruption is not only the  
47 consequence of  $A\beta$  deposit, but also a driver of the amyloid pathology. Experimental data indicate that  $A\beta$   
48 release is regulated by neuronal activity ([Nitsch et al., 1993](#); [Bero et al., 2011](#)) and driven by increased  
49 metabolism ([Cohen et al., 2009](#); [Johnson et al., 2014](#)). Also,  $A\beta$  accumulation is associated with enhanced  
50 neural activity in task-related regions during memory encoding ([Mormino et al., 2012](#)) and reduction of neural  
51 hyperactivity decreases  $A\beta$  aggregation as well as axonal dystrophy and synaptic loss ([Yuan and Grutzendler,](#)  
52 [2016](#)). Lastly, restoration of E-I balance has been shown to rescue circuit dysfunction and ameliorate cognitive

53 impairments in both AD mouse models (Verret et al., 2012; Busche et al., 2015; Yuan and Grutzendler, 2016)  
54 and humans with early AD (Bakker et al., 2012), suggesting a direct link between E-I imbalance and cognitive  
55 malfunction. Taken together, these findings emphasize the significance of identifying E-I imbalance in AD,  
56 particularly in the initial disease stage for early diagnosis and intervention.

57 Functional magnetic resonance imaging (fMRI) is a core noninvasive method to measure brain activity  
58 (Glover, 2011) and has been widely used to study functional network alterations in AD (e.g. Filippi and Agosta,  
59 2011; Brier et al., 2014; Dennis and Thompson, 2014). These studies have revealed both abnormal brain  
60 network activation/deactivation and dysfunctional connectivity patterns in AD involving the default mode  
61 (DMN), salience, executive control and limbic networks (Lustig et al., 2003; Dickerson et al., 2004, 2005;  
62 Celone et al., 2006; Greicius et al., 2004; Menon, 2011; Dhanjal and Wise, 2014; Badhwar et al., 2017; Schultz  
63 et al., 2017). However, conventional fMRI cannot distinguish E and I activity because fMRI signal increases  
64 regardless of selective E or I activation (Devor et al., 2007; Anenberg et al., 2015; Vazquez et al., 2018). This is  
65 not surprising, as activation of inhibitory neurons also consumes energy and triggers subsequent vascular  
66 signaling cascades that drive functional hyperemia (Anenberg et al., 2015; Uhlirova et al., 2016; Vazquez et al.,  
67 2018). Moreover, most current analytic approaches for fMRI, including graph theory, seed-based approaches,  
68 and independent component analysis (Li et al., 2009; Sporns, 2014; Preti et al., 2017) do not allow for  
69 determination of causal relationships between regions, nor do they provide insight into the dynamic meso-scale  
70 neuronal relationships that underpin blood-oxygen-level-dependent (BOLD) signal variations, thus unable to  
71 identify E-I imbalance at circuit levels. Generative modeling, by comparison, builds on biologically plausible  
72 models of neural interactions (Friston et al., 2003; Friston, 2011; Stephan et al., 2015; Li and Yap, 2022) and  
73 thus can, in principle, resolve excitatory versus inhibitory neuronal activity. For example, de Hann et al. (2012,  
74 2017) developed a large-scale neural mass model to examine the effects of excessive neuronal activity on  
75 functional network topology and dynamics. In the first study (de Hann et al., 2012), they demonstrated that  
76 synaptic degeneration induced by neuronal hyperactivity results in hub vulnerability in AD including loss of  
77 spectral power and long-range synchronization. In a subsequent study (de Hann et al., 2017), paradoxically, the

78 authors found that selective stimulation of all excitatory neurons in the network leads to sustained preservation  
79 of network integrity in the presence of activity-dependent synaptic degeneration. Using a computational  
80 framework termed “The Virtual Brain (TVB)”, [Zimmerman et al., \(2018\)](#) estimated personalized local  
81 excitation and inhibition parameters as well as global coupling strength based on resting-state fMRI (rs-fMRI)  
82 data from healthy individuals and patients with amnesic MCI (aMCI) and AD. They demonstrated that the  
83 model parameters required to accurately simulate empirical functional connectivity (FC) significantly correlate  
84 with cognitive performance, which surpasses the predictive capability of empirical connectomes. More recently,  
85 [van Nifterick et al. \(2022\)](#) proposed a multiscale brain network model to link AD-mediated neuronal  
86 hyperactivity to large-scale oscillatory slowing observed from magnetoencephalography (MEG) data in human  
87 early-stage AD patients. They modified relevant model parameters to simulate six literature-based cellular  
88 conditions of AD and compared them to healthy and non-AD scenarios. It was found that neuronal  
89 hyperactivity can indeed result in oscillatory slowing via either over-excitation of pyramidal cells or decreased  
90 excitability of inhibitory interneurons, supporting the hypothesis that E-I imbalance underlies whole-brain  
91 network dysfunction in prodromal AD. Nevertheless, all these previous studies focused on cellular/network  
92 simulation or AD differentiation rather than E-I estimation. In addition, these models used structural  
93 connectivity (SC) from Diffusion Tensor Imaging (DTI) as a proxy for synaptic efficiency, assumed the same  
94 local kinetic parameters for all regions and estimated only one global scaling coefficient for all long-range inter-  
95 regional connections, which cannot infer region-specific E-I imbalance in AD.

96 To overcome the aforementioned limitations of existing modeling studies, we applied a recently  
97 developed computational framework termed “Multiscale Neural Model Inversion (MNMI)” ([Li et al., 2019;](#)  
98 [2021](#)) to the rs-fMRI data obtained from the Alzheimer’s Disease Neuroimaging Initiative (ADNI) database to  
99 identify region-specific E-I imbalance in AD. Compared with other major generative modeling frameworks  
100 such as Dynamic Causal Modeling (DCM; [Friston et al., 2003, 2014; Li et al., 2011](#)) and Biophysical Network  
101 Model (BNM; [Honey et al., 2007, 2009; Deco and Jirsa, 2012; Deco et al., 2013a, b](#)), the strengths of MNMI  
102 include using a biologically plausible neural mass model to describe network dynamics, estimating both intra-

103 regional and inter-regional effective connectivity (EC), and constraining EC estimation with structural  
104 information. Specifically, MNMI estimates within-region (local) recurrent excitation and inhibition coupling  
105 weights as well as inter-regional connection strengths at single subject level based on rs-fMRI, thus enabling the  
106 inference of region-specific E-I balance. We focused our analysis on four functional networks (DMN, salience,  
107 executive control and limbic) due to their critical role and significant disruption in AD pathophysiology ([Lustig  
108 et al., 2003; Greicius et al., 2004; Menon, 2011; Dhanjal and Wise, 2014; Badhwar et al., 2017; Schultz et al.,  
109 2017](#)). Results indicated that MNMI is able to identify altered regional E-I balance in MCI and AD which  
110 deteriorates with disease progression and correlates with cognitive performance. This computational study  
111 offers mechanistic insights into the alteration of E-I balance during AD progression and the findings have the  
112 potential to contribute to the development of novel diagnostic techniques and treatment approaches by enabling  
113 the detection and modulation of E-I imbalance in AD.

114

115

116

117

118

119

120

121

122

123

124

125

126

## 127 **Results**

128 To identify E-I imbalance in AD, we applied the MNMI model (Fig. 1) to a rs-fMRI dataset from ADNI  
129 consisting of 48 normal control (NC), 48 MCI and 48 AD subjects. At the heart of the MNMI framework is a  
130 neural mass model consisting of multiple brain regions each containing one excitatory and one inhibitory neural  
131 populations coupled with reciprocal connections. The excitatory neural populations are interconnected with  
132 long-range fibers whose baseline connection strengths are determined by structural connectivity (SC) from  
133 diffusion MRI. The neural activities are converted to simulated BOLD signals via a hemodynamic response  
134 function (HRF) and simulated FC is computed. MNMI then estimates both intra-regional and inter-regional  
135 connection strengths using genetic algorithm to minimize the difference between simulated and empirical FC  
136 (Fig. 1). We constructed a large network model with 46 regions of interest (ROIs) selected from the DMN,  
137 salience, executive control and limbic/subcortical networks (Table 1), and used the DTI data of 100 unrelated  
138 subjects from the Human Connectome Project (HCP) to calculate the baseline SC matrix. After model  
139 connection parameters (i.e., EC) are estimated for each individual subject, we derived regional E-I balance  
140 based on incoming excitatory and inhibitory connection strengths. We next performed statistical analysis to  
141 identify disrupted EC and E-I balance in MCI and AD. Lastly, we examined the association between E-I  
142 difference (ratio) and cognitive performance represented by the Mini-Mental State Examination (MMSE) score.

### 143 **MNMI performance**

144 The performance of MNMI is illustrated in Fig. 2. The average fitness value (i.e., Pearson's correlation between  
145 simulated and empirical FC) was  $0.6 \pm 0.08$  for NC,  $0.61 \pm 0.07$  for MCI, and  $0.62 \pm 0.08$  for AD, respectively.  
146 Both the simulated neural activity and simulated BOLD signals displayed rhythmic fluctuations (Fig. 2A, B). The  
147 oscillation frequency of the neural activity was about 7-10 Hz, consistent with  $\alpha$  oscillations during relaxed  
148 wakefulness (Hughes and Crunelli, 2005). The frequency of the BOLD signals ranged between 0.01 and 0.05 Hz,  
149 in line with experimental observation (Tong et al., 2019). The empirical and simulated FC are displayed in Fig.  
150 2C, D respectively, where the pattern of the simulated FC closely matched that of the empirical FC (correlation  
151 coefficient 0.68).



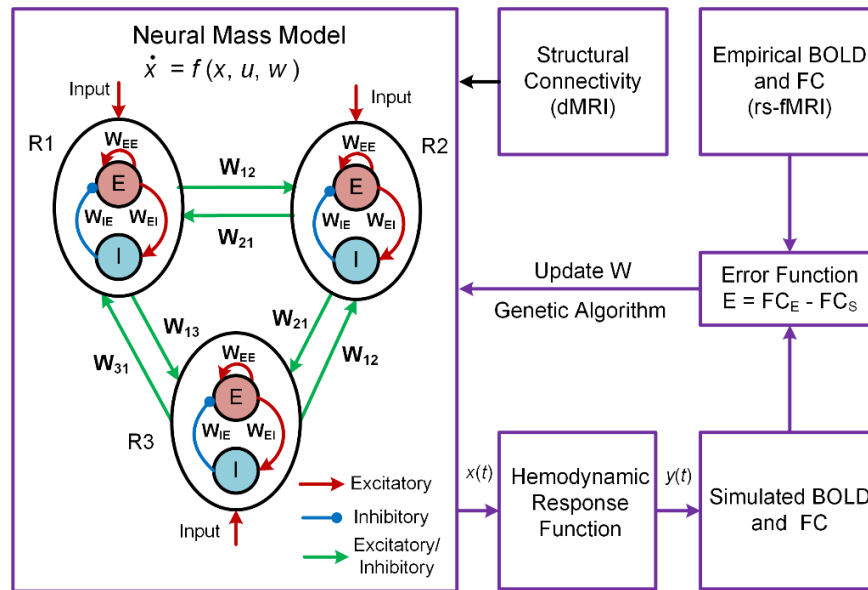

152

153 **Figure 1. Overview of the MNMI framework.** The neural activity ( $x$ ) is described by a neural mass network  
 154 model containing multiple brain regions (R1, R2, etc.). Each region consists of one excitatory (E) and one  
 155 inhibitory (I) neural population with reciprocal connections. Inter-regional connection strength is based on SC  
 156 from diffusion MRI. The neural activity ( $x$ ) is converted to corresponding BOLD signals ( $y$ ) via a hemodynamic  
 157 response function. The model parameters are optimized to minimize the difference between simulated FC and  
 158 empirical FC obtained from rs-fMRI.

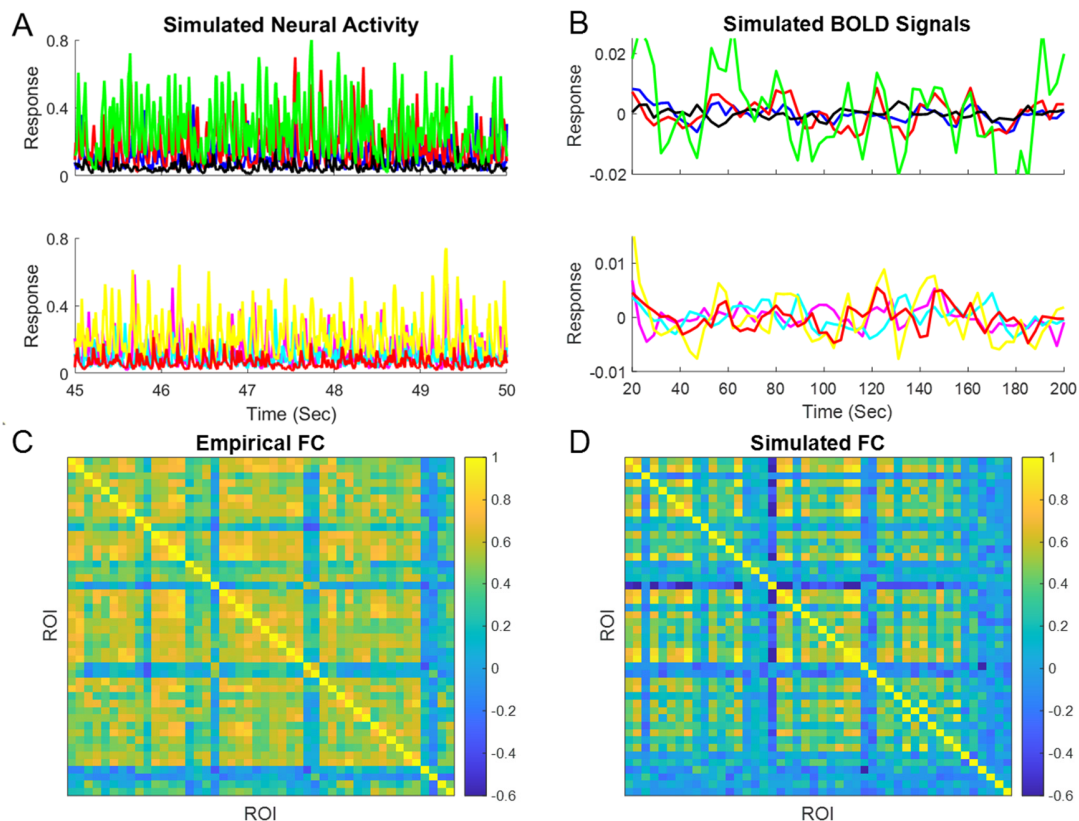

159

160 **Figure 2. Performance of MNMI.** (A) Sample activity of excitatory neural populations in eight randomly  
 161 selected ROIs (four in top and four in bottom). (B) Sample BOLD signals in the same eight ROIs. (C) Empirical  
 162 FC from a randomly selected subject. (D) Simulated FC from the same subject.



163 **Table 1. Regions of interest (ROIs) selected in network modeling.**

| Network                    | ROI                                     | Abbreviation |
|----------------------------|-----------------------------------------|--------------|
| Default Mode Network       | Left inferior parietal cortex           | L.IPC        |
|                            | Right inferior parietal cortex          | R.IPC        |
|                            | Left isthmus cingulate cortex           | L.ICC        |
|                            | Right isthmus cingulate cortex          | R.ICC        |
|                            | Left middle temporal cortex             | L.MTC        |
|                            | Right middle temporal cortex            | R.MTC        |
|                            | Left precuneus                          | L.PCU        |
|                            | Right precuneus                         | R.PCU        |
|                            | Left rostral anterior cingulate cortex  | L.rACC       |
|                            | Right rostral anterior cingulate cortex | R.rACC       |
|                            | Left superior frontal cortex            | L.SFC        |
|                            | Right superior frontal cortex           | R.SFC        |
|                            | Left superior temporal cortex           | L.STC        |
|                            | Right superior temporal cortex          | R.STC        |
|                            | Left posterior cingulate cortex         | L.PCC        |
|                            | Right posterior cingulate cortex        | R.PCC        |
| Salience Network           | Left caudal anterior cingulate cortex   | L.cACC       |
|                            | Right caudal anterior cingulate cortex  | R.cACC       |
|                            | Left supramarginal cortex               | L.SMG        |
|                            | Right supramarginal cortex              | R.SMG        |
|                            | Left insula                             | L.IN         |
|                            | Right insula                            | R.IN         |
| Executive Control Network  | Left caudal middle frontal cortex       | L.cMFC       |
|                            | Right caudal middle frontal cortex      | R.cMFC       |
|                            | Left rostral middle frontal cortex      | L.rMFC       |
|                            | Right rostral middle frontal cortex     | r.rMFC       |
|                            | Left superior parietal cortex           | L.SPC        |
|                            | Right superior parietal cortex          | R.SPC        |
| Limbic/Subcortical Network | Left entorhinal cortex                  | L.ETC        |
|                            | Right entorhinal cortex                 | R.ETC        |
|                            | Left inferior temporal cortex           | L.ITC        |
|                            | Right inferior temporal cortex          | R.ITC        |
|                            | Left thalamus                           | T.THAL       |
|                            | Right thalamus                          | R.THAL       |
|                            | Left caudate                            | L.CA         |
|                            | Right caudate                           | R.CA         |
|                            | Left putamen                            | L.PUT        |
|                            | Right putamen                           | R.PUT        |
|                            | Left pallidum                           | L.PAL        |
|                            | Right pallidum                          | R.PAL        |
|                            | Left hippocampus                        | L.HPC        |
|                            | Right hippocampus                       | R.HPC        |
|                            | Left amygdala                           | L.AMY        |
|                            | Right amygdala                          | R.AMY        |
| Left nucleus accumbens     | L.ACB                                   |              |
| Right nucleus accumbens    | R.ACB                                   |              |

164

165

166

## 167 **Disrupted intra-regional E-I balance in MCI and AD**

168 We first examined whether intra-regional (local) E-I balance was altered in MCI and AD. The recurrent  
169 excitation weights within 46 ROIs are shown in [Fig. 3A1](#) for NC and MCI, [Fig. 3A2](#) for NC and AD, and [Fig.](#)  
170 [3A3](#) for MCI and AD respectively. For the NC to MCI comparison of recurrent excitation, three regions (R.IPC,  
171 L.rACC and R.cACC) showed marginally significant decrease ( $p < 0.05$ , uncorrected), and three regions  
172 (R.ETC, L.PAL and R.ACB) showed marginally significant increase ( $p < 0.05$ , uncorrected) ([Fig. 3A1](#)). For NC  
173 versus AD, six regions displayed significant difference in recurrent excitation, including L.cMFC, R.PAL,  
174 L.HPC and L.AMY with decreased excitation, and L.PCC and R.ACB with increased excitation ([Fig. 3A2](#)). The  
175 significant excitation increase in R.ACB survived correction for multiple comparisons ( $p < 0.05$ , FDR  
176 corrected), and the R.ACB was the only region that showed significant and consistent excitation change across  
177 both MCI and AD. Regarding the comparison of MCI versus AD, only the region of R.AMY showed  
178 marginally significant decrease in AD ( $p < 0.05$ , uncorrected; [Fig. 3A3](#)). This suggests that as a prodromal stage  
179 of AD, MCI has similar recurrent excitation levels as AD, though AD shows more significant impairment in  
180 certain brain regions (e.g., R.ACB) when compared with NC.

181 Comparison of the recurrent inhibition weights within 46 ROIs is shown in [Fig. 3B1](#) for NC and MCI,  
182 [Fig. 3B2](#) for NC and AD, and [Fig. 3B3](#) for MCI and AD, respectively. Both MCI and AD showed significant  
183 difference in recurrent inhibition compared to NC. In MCI, the recurrent inhibition weight of five regions  
184 (L.cMFC, R.SPC, R.ITC, L.PAL and R.ACB) was significantly decreased ( $p < 0.05$ ) while one region (L.SFC)  
185 showed significant increase ( $p < 0.05$ ; [Fig. 3B1](#)). In particular, the change in L.cMFC survived multiple  
186 comparison correction ( $p < 0.05$ , FDR corrected). In AD, the change in recurrent inhibition was much more  
187 pronounced than in MCI ([Fig. 3B2](#)). Specifically, eleven ROIs exhibited a significant difference in AD  
188 compared with NC, and the change in seven ROIs passed multiple comparison correction. The recurrent  
189 inhibition of R.ICC, L.PCU, R.rACC, L.PCC, L.cMFC, R.SPC, R.ITC and L.PAL was significantly reduced,  
190 while that of L.SFC, R.cACC and L.HPC was significantly increased in AD. The regions that survived multiple  
191 comparison correction included R.ICC, R.cACC, L.cMFC, R.SPC, R.ITC, L.PAL and L.HPC ([Fig. 3B2](#),

192 marked by double pink stars). Notably, five ROIs showed consistent change in recurrent inhibition across both  
 193 MCI and AD (compare Fig. 3B1 with Fig. 3B2), specifically L.SFC, L.cMFC, R.SPC, R.ITC and L.PAL.  
 194 Importantly, the difference in R.SPC, R.ITC and L.PAL was only marginally significant in MCI, but was robust  
 195 to correction for multiple comparisons in AD, suggesting greater disruption of inhibitory interactions in AD  
 196 than in MCI. Despite greater impairments of recurrent inhibition in AD than MCI, the difference between MCI  
 197 and AD was only marginally significant in three ROIs including L.cACC, R.cACC, and R.ACB (Fig. 3B3).  
 198 Again, this suggests that the changes in recurrent excitation and inhibition become more subtle from MCI to  
 199 AD, compared with the changes from NC to MCI or AD.

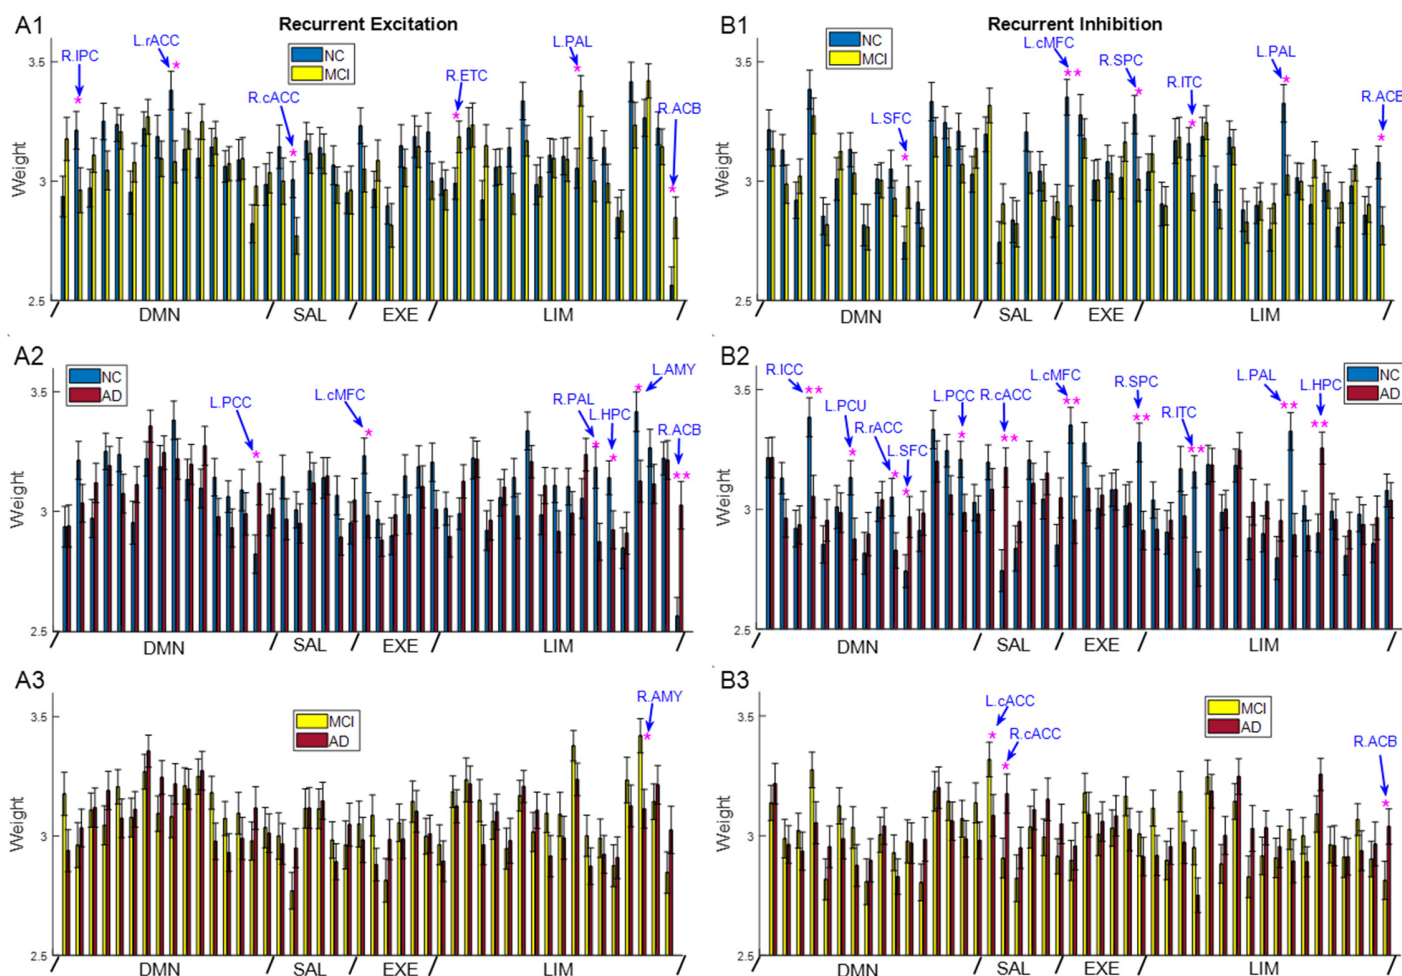

200 **Figure 3. Impaired local recurrent excitation and inhibition in MCI and AD.** Comparison of average  
 201 recurrent excitation weight between NC and MCI (A1), NC and AD (A2), and MCI and AD (A3) for all 46 ROIs.  
 202 Comparison of average recurrent inhibition weight between NC and MCI (B1), NC and AD (B2), and MCI and  
 203 AD (B3) for all 46 ROIs. One star indicates uncorrected significance ( $p < 0.05$ ) and double stars indicate  
 204 corrected significance by FDR ( $p < 0.05$ ). DMN: default mode network, SAL: salience network, EXE: executive  
 205 control network, LIM: limbic network. Error bars indicate standard errors.

208 **Table 2. Alterations in recurrent excitation and inhibition strength in MCI and AD (compared with NC).**  
 209 Up arrows indicate increase and down arrows indicate decrease. One star indicates uncorrected significance  
 210 and double stars indicate corrected significance by FDR.

| Network | ROI    | MCI        |            | AD         |            |
|---------|--------|------------|------------|------------|------------|
|         |        | Excitation | Inhibition | Excitation | Inhibition |
| DMN     | R.IPC  | * ↓        |            |            |            |
|         | R.ICC  |            |            |            | ** ↓       |
|         | L.PCU  |            |            |            | * ↓        |
|         | L.rACC | * ↓        |            |            |            |
|         | R.rACC |            |            |            | * ↓        |
|         | L.SFC  |            | * ↑        |            | * ↑        |
|         | L.PCC  |            |            | * ↑        | * ↓        |
| SAL     | R.cACC | * ↓        |            |            | ** ↑       |
| EXE     | L.cMFC |            | ** ↓       | * ↓        | ** ↓       |
|         | R.SPC  |            | * ↓        |            | ** ↓       |
| LIM     | R.ETC  | * ↑        |            |            |            |
|         | R.ITC  |            | * ↓        |            | ** ↓       |
|         | L.PAL  | * ↑        | * ↓        |            | ** ↓       |
|         | R.PAL  |            |            | * ↓        |            |
|         | L.HPC  |            |            | * ↓        | ** ↑       |
|         | L.AMY  |            |            | * ↓        |            |
|         | R.ACB  | * ↑        | * ↓        | ** ↑       |            |

211

212 To visualize the alterations in recurrent excitation and inhibition better, we listed the significant changes  
 213 in MCI and AD (from NC) in [Table 2](#) where an up arrow indicates a significant increase while a down arrow  
 214 indicates a significant decrease. Several observations can be made. First, more connections were significantly  
 215 different in AD than MCI. This is to be expected as AD represents a more severe disease stage than MCI.  
 216 Second, the strength of the majority of connections (69%) was decreased in MCI/AD compared with NC. This  
 217 is consistent with the widespread decrease in FC during the progression of AD ([Filippi and Agosta, 2011](#); [Brier  
 218 et al., 2014](#); [Dennis and Thompson, 2014](#)). Third, if a region exhibited impairments in both recurrent excitation  
 219 and inhibition, their directions of change were opposite to each other thus strengthening E-I imbalance, except  
 220 for the executive control network where recurrent excitation and recurrent inhibition changed in the same  
 221 direction. This suggests the existence of compensatory mechanisms in the executive control network to  
 222 maintain similar E-I balance in the presence of AD pathology due to the critical role of this network in cognitive  
 223 function ([Miller et al., 2001](#); [Petrides, 2005](#); [Koechlin and Summerfield, 2007](#)). Lastly, recurrent inhibition is

224 more significantly disrupted by MCI/AD than recurrent excitation, in agreement with the emerging viewpoint of  
 225 interneuron dysfunction in network impairments (Li et al., 2016; Palop and Mucke, 2016; Xu et al., 2020). The  
 226 consistent impairment of recurrent inhibition across MCI and AD also suggests that inhibitory connections are a  
 227 more stable biomarker of AD than excitatory connections.

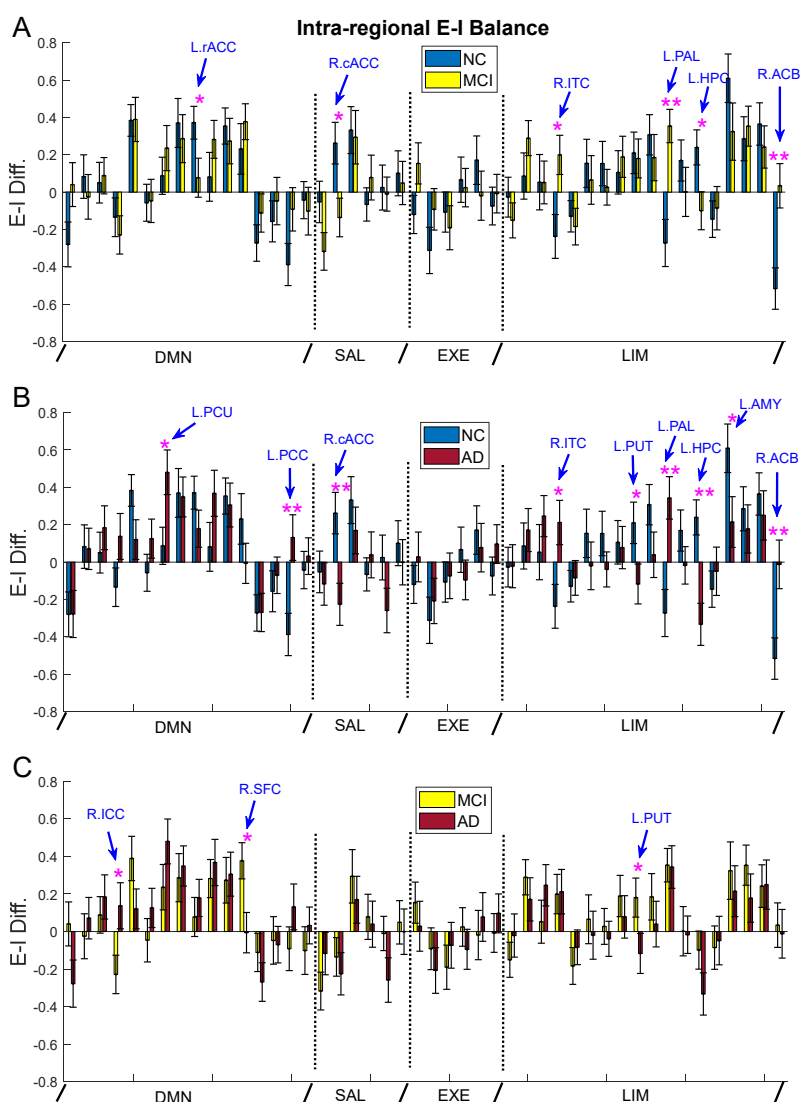

228 **Figure 4. Disrupted intra-regional E-I balance in MCI and AD.** Comparison of local E-I difference (recurrent  
 229 excitation – recurrent inhibition) between NC and MCI (A), NC and AD (B), and MCI and AD (C) for all 46  
 230 ROIs. One star indicates uncorrected significance and double stars indicate corrected significance by FDR ( $p <$   
 231 0.05).  
 232

233  
 234 The alteration in recurrent excitation and inhibition strengths resulted in intra-regional E-I imbalance in  
 235 MCI and AD as shown in Fig. 4. The intra-regional (local) E-I balance was quantified as the E-I difference (i.e.,  
 236 recurrent excitation strength – recurrent inhibition strength; similar results were obtained for E/I ratio), which

237 measures the level of net excitation. In MCI, three regions showed a significant decrease in intra-regional E-I  
238 difference without passing multiple comparison correction, including L.rACC, R.cACC and L.HPC (Fig. 4A).  
239 Three other regions in the limbic network displayed significant increase in intra-regional E-I difference,  
240 including R.ITC, L.PAL and R.ACB, among which the elevation within L.PAL and R.ACB passed multiple  
241 comparison correction. In AD, five regions showed consistent E-I impairments as MCI, including R.cACC,  
242 R.ITC, L.PAL, L.HPC and R.ACB (Fig. 4B). Notably, the E-I alteration in R.cACC and L.HPC became more  
243 robustly significant in AD than MCI, surviving multiple comparison correction (the corrected significance in  
244 L.PAL and R.ACB maintained as MCI). In addition to the five common ROIs, intra-regional E-I balance in  
245 L.PCU, L.PCC, L.PUT and L.AMY were also impaired in AD, with a significant increase in L.PCU and  
246 L.PCC, and a significant decrease in L.PUT and L.AMY ( $p < 0.05$ ). The increase in L.PCC was able to pass  
247 correction for multiple comparisons ( $p < 0.05$ , FDR corrected). In contrast to the marked E-I balance changes  
248 from NC to MCI/AD, the changes from MCI to AD were much less pronounced with only three ROIs showing  
249 uncorrected significance (R.ICC, R.SFC, and L.PUT; Fig. 4C). Specifically, the E-I difference of R.SFC and  
250 L.PUT was significantly decreased ( $p < 0.05$ , uncorrected), while that of R.ICC was significantly increased ( $p <$   
251  $0.05$ , uncorrected). Overall, intra-regional E-I imbalance in MCI and AD was highly consistent and  
252 concentrated on the limbic network (Fig. 4A, B). Also, in MCI/AD, about half of the brain regions showed  
253 increased intra-regional E-I difference while the other half exhibited reduced E-I difference when compared  
254 with NC. To visualize the progressive changes in E-I balance from NC to MCI and to AD, we fit a linear model  
255 to the local E-I difference of all NC, MCI and AD subjects and found the model significance of six brain  
256 regions passed correction for multiple comparison ( $p < 0.05$ , FDR corrected) including L.PCC, R.cACC, R.ITC,  
257 L.PAL, L.HPC, and R.ACB. Specifically, the E-I difference of L.PCC, R.ITC, L.PAL and R.ACB was  
258 progressively increased from NC to MCI and to AD, while the E-I difference of R.cACC and L.HPC was  
259 progressively decreased from NC to MCI and to AD. Notably, the brain regions that survived multiple  
260 comparison correction for the linear model were consistent with those regions showing common significant  
261 changes across MCI and AD (Fig. 4A, B), except for L.PCC which displayed significant change in AD only.

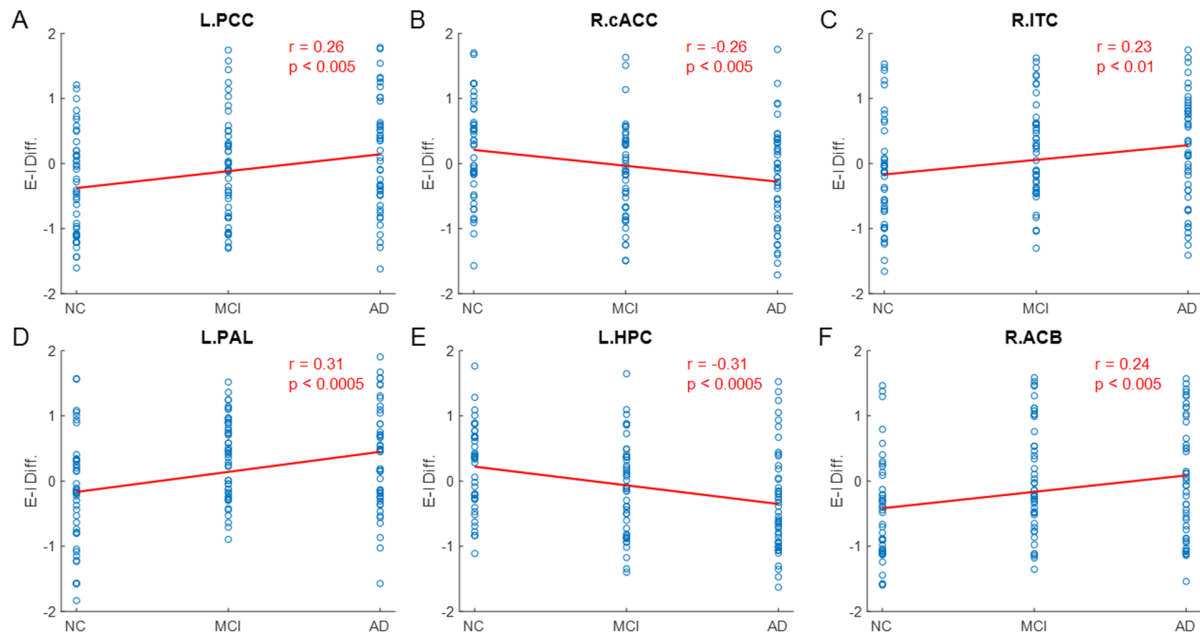

262  
263 **Figure 5. Progressive changes in intra-regional E-I balance from NC to MCI and to AD.** Local E-I  
264 difference of NC, MCI and AD subjects is fit by a linear model for (A) L.PCC, (B) R.cACC, (C) R.ITC, (D)  
265 L.PAL, (E) L.HPC, and (F) R.ACB. The significance of the linear fit for all six ROIs passes multiple comparison  
266 correction by FDR ( $p < 0.05$ ).  
267  
268

269 We next examined network-averaged recurrent excitation and inhibition changes in MCI and AD. There  
270 was no significant difference between NC and MCI for recurrent excitation (Fig. 6A) while the executive  
271 control network showed decreased recurrent inhibition in MCI compared with NC ( $p < 0.05$ , uncorrected; Fig.  
272 6B). By comparison, significant reduction in both recurrent excitation and inhibition was observed in the  
273 executive control network in AD and the change in recurrent inhibition survived multiple comparison correction  
274 (Fig. 6A, B). Moreover, the DMN exhibited a reduction in recurrent inhibition while the salience network  
275 showed an increase in recurrent inhibition ( $p < 0.05$ , uncorrected; Fig. 6B). Thus, on the network level,  
276 impairments in recurrent excitation and inhibition became more notable in AD than in MCI and the executive  
277 control network showed the most significant and consistent alterations. The decrease in both recurrent  
278 excitation and inhibition may compensate for the loss of each other, thus maintaining a relatively stable E-I  
279 balance in the executive control network. Lastly, no significant difference was observed between MCI and AD,  
280 indicating a similar impairment level at the network level.



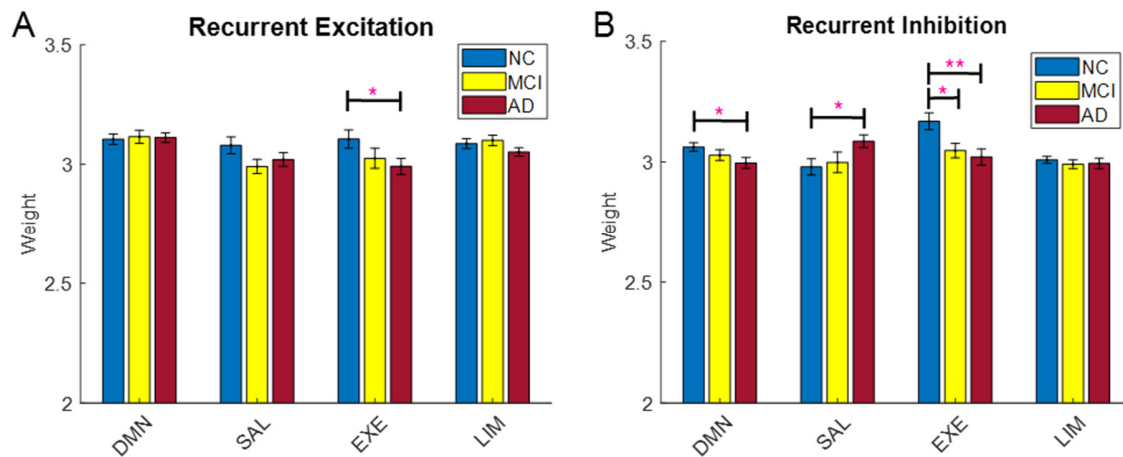

**Figure 6. Network-averaged recurrent excitation and inhibition weight.** (A) Comparison of average recurrent excitation weight within four functional networks among NC, MCI and AD. (B) Comparison of average recurrent inhibition weight within four functional networks among NC, MCI and AD. One star indicates uncorrected significance and double stars indicate corrected significance by FDR ( $p < 0.05$ ).

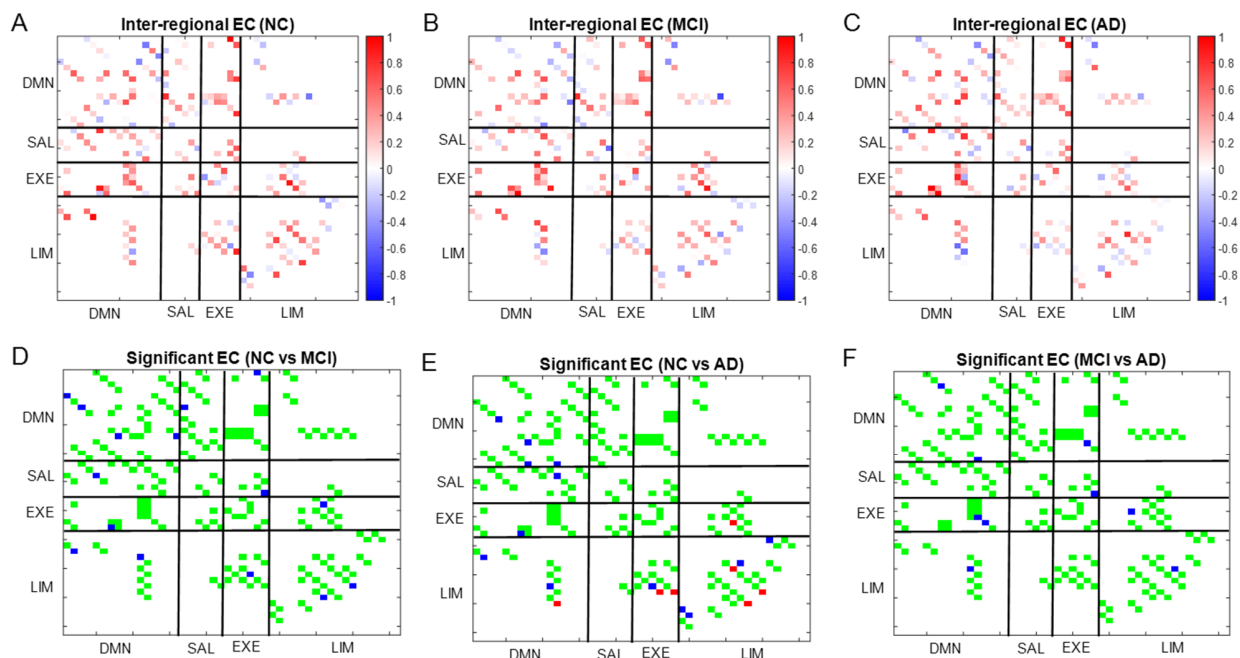

**Figure 7. Altered inter-regional EC in MCI and AD.** Average inter-regional EC matrix for NC (A), MCI (B), and AD (C). (D) Significant EC connections in MCI when compared with NC. (E) Significant EC connections in AD when compared with NC. (F) Significant EC connections in AD when compared with MCI. For (D-F), green edges indicate insignificant connections, blue edges indicate uncorrected significant connections ( $p < 0.05$ ), and red edges indicate significant connections corrected by the Network-based Statistics (NBS;  $p < 0.05$ ).

### Disrupted inter-regional E-I balance in MCI and AD

In addition to intra-regional recurrent connections, inter-regional excitatory and inhibitory connections were also disrupted in MCI and AD. The color-coded average inter-regional EC matrices for NC, MCI and AD are shown in Fig. 7A, B, and C, respectively (the white area indicates removed weak connections). We observed that the EC patterns were similar for NC, MCI and AD where there were more excitatory (positive) connections

299 than inhibitory (negative) connections. The significant EC connections in MCI (compared to NC) are indicated  
300 by the blue edges in [Fig. 7D](#) ( $p < 0.05$ , uncorrected), where they were broadly distributed among the four  
301 networks. The significant EC connections in AD (compared to NC) are shown in [Fig. 7E](#) where the blue edges  
302 indicate uncorrected significant connections and the red edges denote significant connections corrected by  
303 Network-based Statistics (NBS; [Zalesky et al., 2010](#)). Compared with MCI, the significant connections in AD  
304 concentrated more within and between the DMN and limbic networks. Of note, the corrected significant  
305 connections (red edges) involved mostly the executive control and limbic networks. Multiple significant  
306 connections also existed between MCI and AD comparison ( $p < 0.05$ , uncorrected; [Fig. 7F](#)), which mostly  
307 involved the DMN and executive control network. It should be noted that the overlap of significant connections  
308 among the three-way comparison (NC-MCI, NC-AD and MCI-AD) is low. To visualize the EC changes better,  
309 we compared the significant inter-regional EC between NC and MCI in [Fig. 8A](#), between NC and AD in [Fig.](#)  
310 [8B](#), and between MCI and AD in [Fig. 8C](#). As indicated by the EC difference in the bottom panels, most of the  
311 connections had less excitatory influence (or more inhibitory influence) in MCI and AD than NC ([Fig. 8A, B](#)),  
312 indicating less excitatory communication between regions in MCI and AD. The corrected significant  
313 connections in AD included R.SPC→R.PUT, R.CA→R.THAL, R.SFC→R.PAL, R.PAL→R.PUT,  
314 R.rMFC→R.PUT, R.CA→R.rMFC, and R.PUT→R.PAL. Interestingly, most of the significant connections had  
315 increased EC in AD compared with MCI ([Fig. 8C](#)). This suggests that progression of AD may involve different  
316 sets of inter-regional connections that are differentially disrupted.

317 To evaluate the inter-regional E-I balance change in MCI and AD, we computed the inter-regional E-I  
318 difference (i.e., difference between the sum of all positive incoming EC and the absolute sum of all negative  
319 incoming EC) to a particular ROI ([Fig. 9](#)). The E-I change from NC to MCI is shown in [Fig. 9A](#) where six  
320 regions showed impaired inter-regional E-I balance ( $p < 0.05$ , uncorrected). A majority of the six ROIs showed  
321 decreased excitation, including L.PCU, R.IN, R.ITC, R.PUT and R.PAL, and only one ROI (R.cMFC)  
322 exhibited increased excitation. In AD, three common regions showed reduced net excitation as MCI, including  
323 R.ITC, R.PUT and R.PAL, all belonging to the limbic network ([Fig. 9B](#)). In particular, the significant changes  
324 in R.PUT and R.PAL were able to survive correction for multiple comparison by FDR, again indicating more

325 severe E-I disruption in AD than MCI. Moreover, the E-I difference of L.HPC was significantly reduced ( $p <$   
 326  $0.05$ ), while that of R.PCC was significantly elevated in AD ( $p < 0.05$ ), both without passing multiple  
 327 comparison correction. Comparison of the E-I difference between MCI and AD indicated that four brain regions  
 328 had significant E-I balance changes ( $p < 0.05$ , uncorrected, Fig. 9C). Specifically, the E-I difference of L.IN,  
 329 L.rMFC, and L.THAL was significantly reduced while that of R.PCC was significantly increased. Of note, the  
 330 E-I difference of R.PCC was also significantly elevated in AD when compared with NC (Fig. 9B). We then fit a  
 331 linear model to the E-I difference and found that the net excitation of R.PUT and R.PAL, the two regions with  
 332 corrected significance in AD (Fig. 9B), reduced significantly from NC to MCI and to AD ( $p < 0.05$ , FDR  
 333 corrected; Fig. 10). Overall, inter-regional E-I difference shows a decreasing trend over the course of AD  
 334 progression, consistent with the majority of reduced inter-regional EC (Fig. 8).

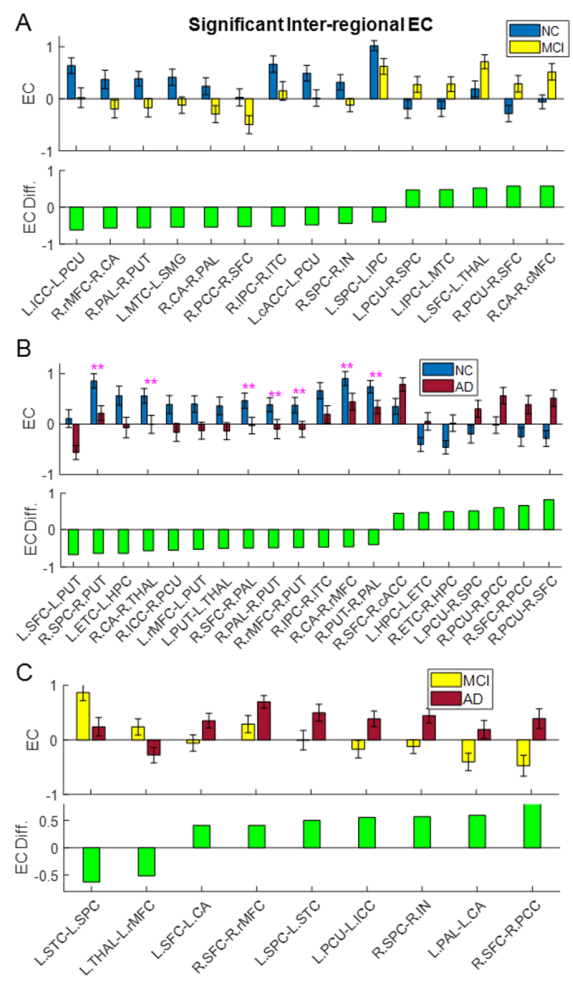

335 **Figure 8. Significant inter-regional connections for group pairwise comparison.** Significant inter-regional  
 336 EC for NC and MCI comparison (A), NC and AD comparison (B) and MCI and AD comparison (C). The top  
 337 panel plots the average inter-regional EC while the bottom panel plots the EC difference between the two  
 338 compared groups. Double stars indicate corrected significance by NBS ( $p < 0.05$ ).  
 339

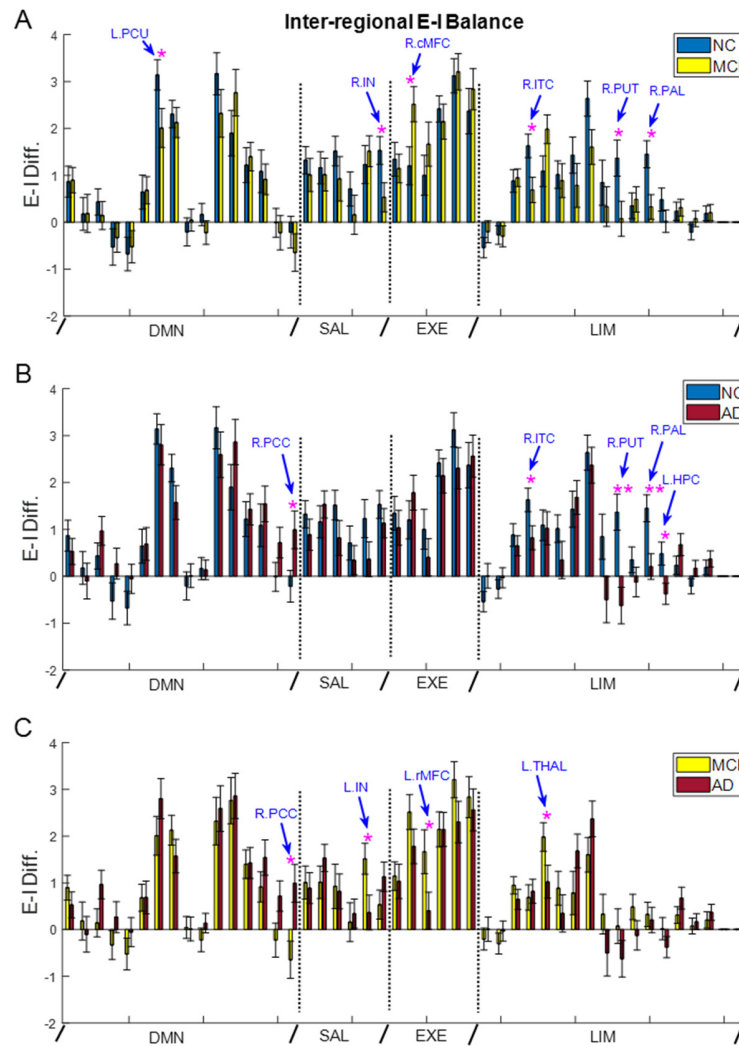

340  
341  
342  
343  
344

**Figure 9. Disrupted inter-regional E-I balance in MCI and AD.** Comparison of inter-regional E-I difference between NC and MCI (A), NC and AD (B), and MCI and AD (C). One star indicates uncorrected significance and double stars indicate corrected significance by FDR ( $p < 0.05$ ).

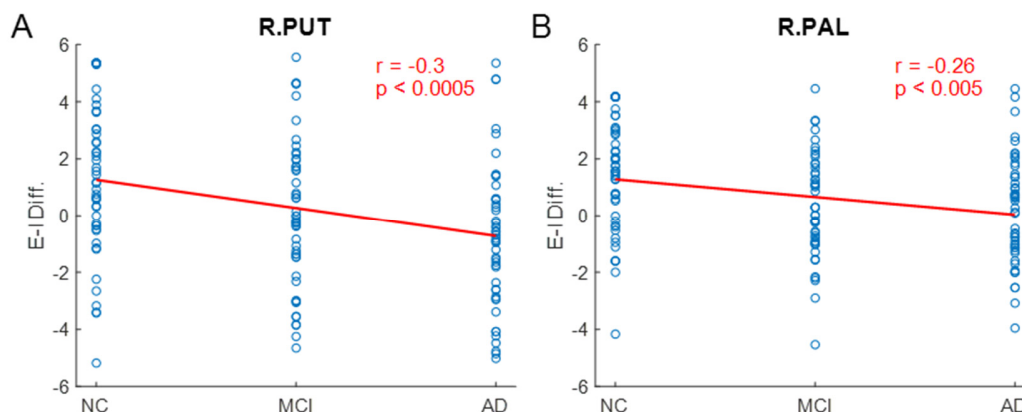

345  
346  
347  
348  
349

**Figure 10. Progressive changes in inter-regional E-I balance from NC to MCI and to AD.** Inter-regional E-I difference of NC, MCI and AD subjects is fit by a linear model for (A) R.PUT, and (B), R.PAL. The significance of the linear fit for both ROIs passes multiple comparison correction by FDR ( $p < 0.05$ ).

350 The average inter-network EC (summation of all excitatory and inhibitory inter-regional EC between  
 351 networks) is shown in Fig. 11. We observed that the EC from the executive control network to the salience  
 352 network was significantly decreased in MCI when compared to NC ( $p < 0.05$ , uncorrected; Fig. 11A, B). In AD,  
 353 the EC from the executive control network to the limbic network and the EC from the DMN to the limbic  
 354 network were significantly reduced compared to NC with the latter passing multiple comparison correction ( $p <$   
 355  $0.05$ , FDR corrected) (Fig. 11A, C), suggesting cortical-limbic decoupling. Moreover, the EC from the limbic  
 356 network to the executive network was significantly decreased from MCI to AD ( $p < 0.05$ , uncorrected; Fig.  
 357 11B, C). Overall, the excitatory interactions between networks are substantially decreased in MCI and AD when  
 358 compared with NC, consistent with the predominant reduced inter-regional EC during AD progression (Fig. 8).

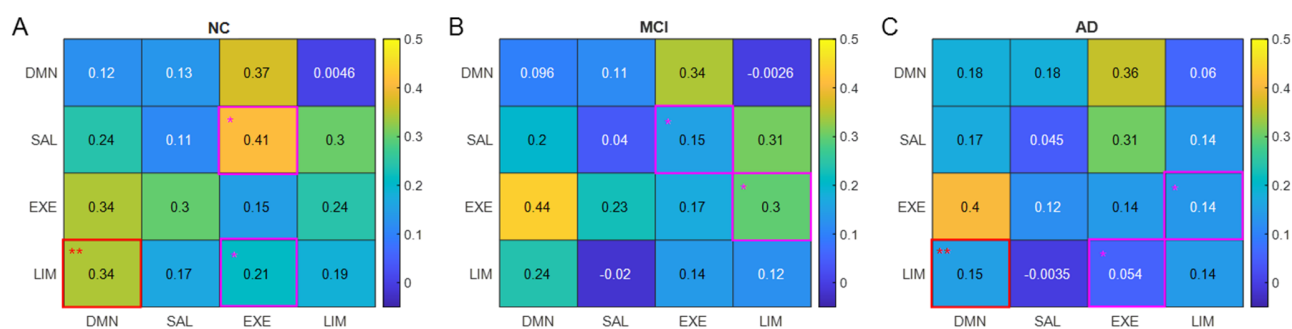

359 **Figure 11. Altered inter-network connection strength in MCI and AD. (A)** Average inter-network EC in NC.  
 360 **(B)** Average inter-network EC in MCI. **(C)** Average inter-network EC in AD. Pink boxes (with one star) indicate  
 361 uncorrected significance ( $p < 0.05$ ) and red boxes (with double stars) indicate corrected significance ( $p < 0.05$ ,  
 362 corrected by FDR) for the corresponding connections.  
 363

364  
 365 **Disrupted overall E-I balance in MCI and AD**

366 The above analysis indicates that both intra-regional and inter-regional E-I balance are impaired in MCI and  
 367 AD. As the overall neural excitability depends on both intra-regional and inter-regional input drive, we  
 368 computed the overall E-I balance as the difference between net excitation (recurrent excitation + all incoming  
 369 excitatory inter-regional EC) and net inhibition (recurrent inhibition + all incoming inhibitory inter-regional  
 370 EC) for all ROIs. We found that the overall E-I balance was altered in a number of regions in MCI and AD and  
 371 most of the regions were located in the limbic network (Fig. 12). Specifically, the E-I difference of R.IN,  
 372 R.PUT, R.PAL and L.HPC was significantly decreased ( $p < 0.05$ ), while that of R.cMFC and R.ACB was  
 373 significantly increased in MCI ( $p < 0.05$ ); the change in R.PAL and R.ACB survived multiple comparison

374 correction (Fig. 12A). In AD, the changes in overall E-I balance remained consistent for R.PUT, R.PAL, L.HPC  
375 and R.ACB, all four regions from the limbic network (compare Fig. 12B with 12A). In addition to R.PAL and  
376 R.ACB, the E-I balance changes in R.PUT and L.HPC were able to pass multiple comparison correction in AD.  
377 Besides, the overall E-I difference of L.PUT was significantly reduced, while that of L.PCC and R.PCC was  
378 significantly increased in AD ( $p < 0.05$ , Fig. 12B), all without surviving multiple comparison correction.  
379 Comparison of the overall E-I balance between MCI and AD revealed that four regions exhibited significant  
380 difference ( $p < 0.05$ , uncorrected), including L.ICC, L.PCC, R.PCC and L.IN (Fig. 12C). Specifically, the E-I  
381 difference of L.ICC, L.PCC and R.PCC were significantly increased, while that of L.IN was significantly  
382 reduced from MCI to AD. Of note, the E-I differences in L.PCC and R.PCC were also significantly increased  
383 from NC to AD ( $p < 0.05$ , uncorrected, Fig. 12B), but not from NC to MCI. This suggests that E-I disruption in  
384 PCC may be specific to the disease progression from MCI to AD and an elevation in excitability in the  
385 cingulate regions may signal the transition from MCI to AD. In contrast, significant E-I alterations in the limbic  
386 network (R.PUT, R.PAL, L.HPC and R.ACB) were observed in both NC-MCI and NC-AD comparison (Fig.  
387 12A, B), but not in MCI-AD comparison (Fig. 12C). This indicates that E-I impairment in the limbic network  
388 was specific to NC to MCI progression and could be served as early biomarker for AD. Consistent with the  
389 common E-I alterations across MCI and AD, linear model analysis revealed the same four brain regions (out of  
390 46 ROIs) in the limbic network (i.e., R.PUT, R.PAL, L.HPC and R.ACB) that exhibited significant progressive  
391 E-I changes from NC to MCI/AD ( $p < 0.05$ , FDR corrected; Fig. 13). Specially, the overall E-I difference in  
392 R.PUT, R.PAL and L.HPC was progressively reduced (Fig. 13A-C), while that of R.ACB was progressively  
393 increased from NC to MCI and to AD (Fig. 13D). Lastly, we examined the change of spontaneous input during  
394 AD progression. There was no difference in spontaneous input between NC and MCI, while the spontaneous  
395 input was significantly decreased in AD, when compared with NC or MCI ( $p < 0.05$ , FDR corrected; Fig. 14).  
396 This suggests that the overall excitatory drive to the network is reduced in the AD phase, consistent with overall  
397 reduction in E-I difference.

398



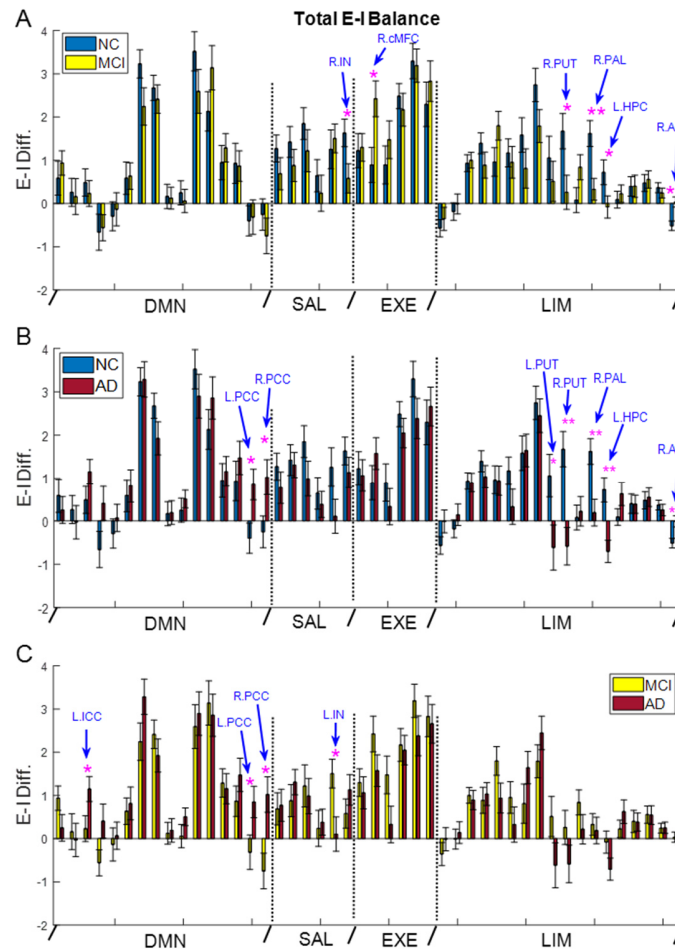

399  
400  
401  
402

**Figure 12. Disrupted overall E-I balance in MCI and AD.** Comparison of total E-I difference between NC and MCI (A), NC and AD (B), and MCI and AD (C). One star indicates uncorrected significance and double stars indicate corrected significance by FDR ( $p < 0.05$ ).

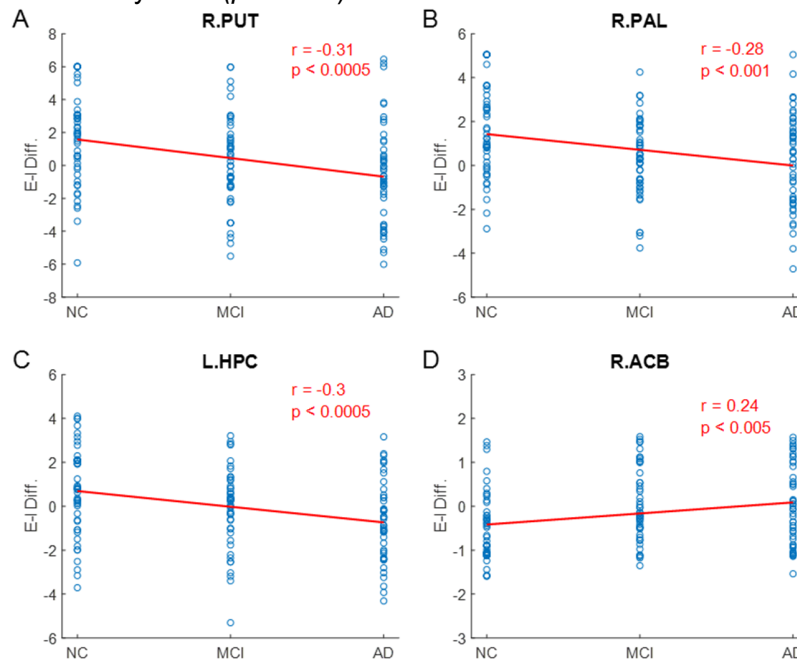

403  
404  
405  
406

**Figure 13. Progressive changes in overall E-I balance from NC to MCI and to AD.** Total E-I difference of NC, MCI and AD subjects is fit by a linear model for (A) R.PUT, (B) R.PAL, (C) L.HPC and (D) R.ACB. The significance of the linear fit for all four ROIs passes multiple comparison correction by FDR ( $p < 0.05$ ).



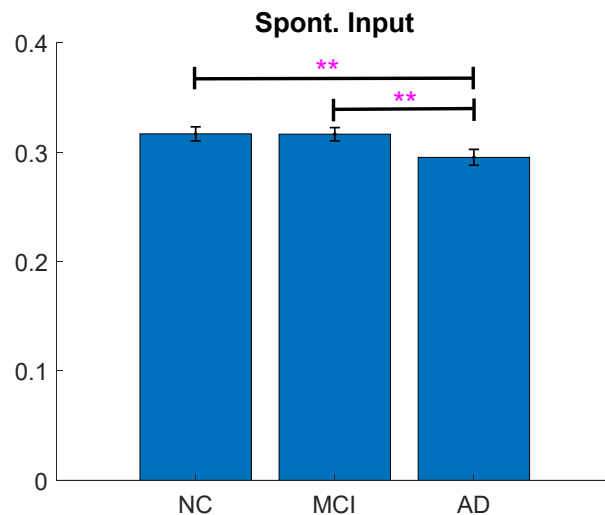

407  
408  
409  
410

**Figure 14. Comparison of estimated spontaneous inputs among NC, MCI and AD. Double stars indicate corrected significance by FDR ( $p < 0.05$ ).**

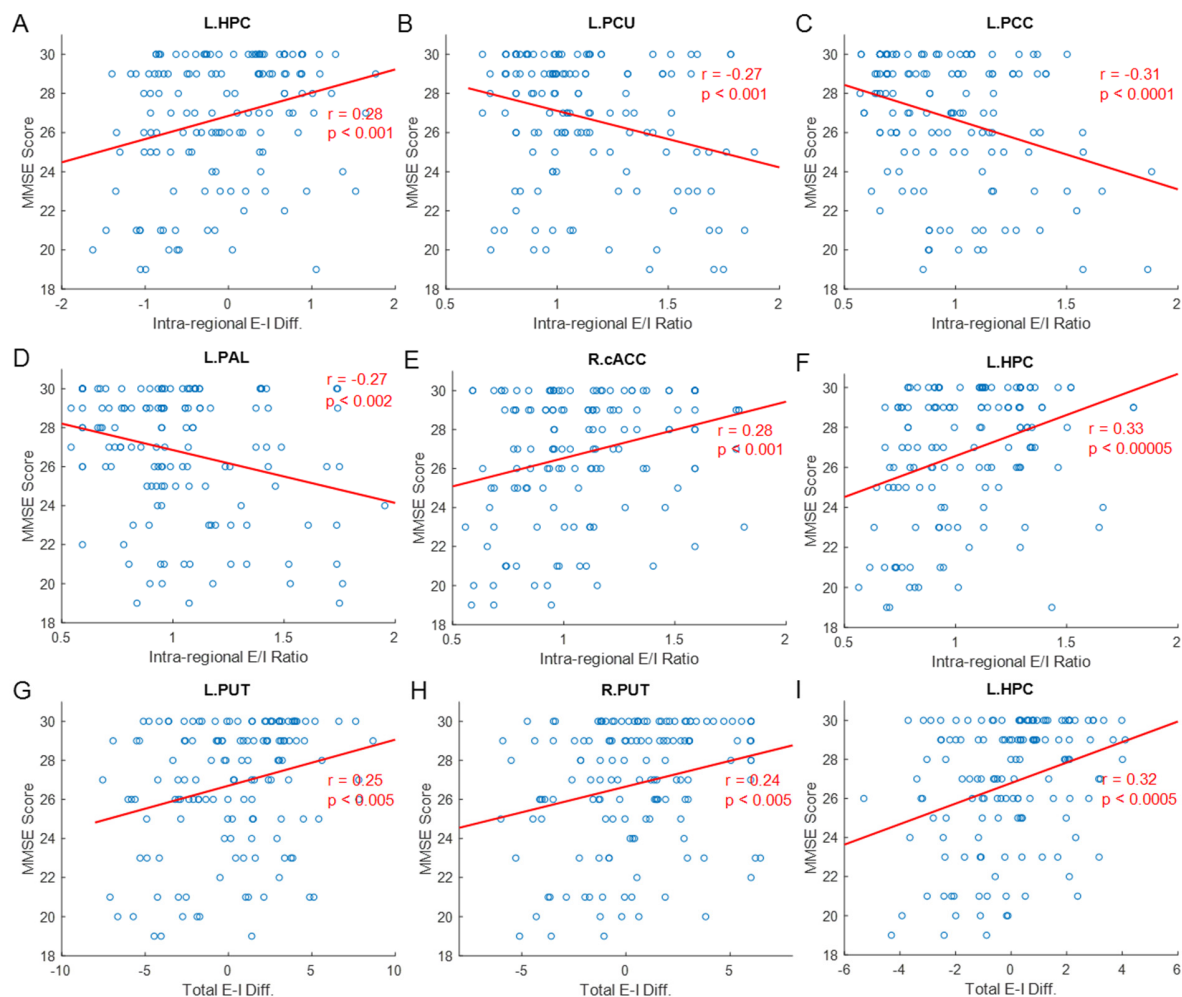

411  
412  
413  
414  
415  
416

**Figure 15. Correlation between regional E-I balance and MMSE score. (A)** Scatter plot between intra-regional E-I difference and MMSE score. **(B-F)** Scatter plots between intra-regional E/I ratio and MMSE score for L.PCU, L.PCC, L.PAL, R.cACC, and L.HPC. **(G-I)** Scatter plots between total E-I difference and MMSE score for L.PUT, R.PUT, and L.HPC. The significance of all correlations passes FDR correction for multiple comparison ( $p < 0.05$ ).

## 417 **Association between regional E-I balance and cognitive performance**

418 To evaluate the behavioral relevance of E-I imbalance in AD progression, we examined the association between  
419 regional E-I balance and MMSE score. We performed the correlation analysis for intra-regional, inter-regional  
420 and total E-I balance respectively. The intra-regional and total E-I balance were evaluated as both the E-I  
421 difference (difference between E and I) and E/I ratio, while inter-regional E-I balance is assessed as the E-I  
422 difference only (see Methods). We computed the Pearson's correlation between regional E-I balance and  
423 MMSE score for all 46 ROIs and the correlation that passed FDR correction ( $p < 0.05$ ) is reported in [Fig. 15](#).  
424 For intra-regional E-I balance, we observed that the E-I difference in L.HPC was positively correlated with the  
425 MMSE score ([Fig. 15A](#)), indicating that lower excitation in L.HPC was associated with lower MMSE score in  
426 MCI/AD. When intra-regional E-I balance was evaluated as E/I ratio, five regions showed significant  
427 correlation with MMSE score, including L.PCU, L.PCC, L.PAL, R.cACC, and L.HPC ([Fig. 15B-F](#)).  
428 Specifically, the E/I ratio in L.PCU, L.PCC and L.PAL was negatively correlated with MMSE score, while that  
429 in R.cACC and L.HPC was positively correlated with MMSE score. Thus, the higher intra-regional E/I ratio in  
430 L.PCU, L.PCC and L.PAL was associated with lower MMSE score in MCI/AD, which became opposite for  
431 R.cACC and L.HPC. For total E-I balance, we found that the E-I difference in L.PUT, R.PUT and L.HPC was  
432 positively correlated with MMSE score, suggesting that lower overall excitation in these three regions was  
433 associated with lower MMSE score in MCI/AD. If the total E-I balance was assessed as E/I ratio, only one  
434 region (L.HPC) exhibited significant (positive) correlation with MMSE score (result not shown). In contrast, no  
435 significant correlation was able to pass multiple comparison correction for the association between inter-  
436 regional E-I balance and MMSE score. Taken together, regional E-I imbalance is a meaningful physiological  
437 substrate for cognitive impairment. Notably, intra-regional E-I balance as measured by local recurrent excitation  
438 and inhibition strengths shows the strongest correlation with cognitive performance, suggesting the importance  
439 of measuring and modulating intra-regional E-I imbalance for AD diagnosis and treatment. Moreover, the left  
440 HPC exhibits the most robust association with MMSE score which remains highly significant for both intra-  
441 regional and total E-I balance, and for evaluation using both E-I difference and E/I ratio. For the other six brain  
442 regions with significant correlation with MMSE score, L.PCU and L.PCC belong to the DMN, R.cACC belongs

443 to the salience network, and L.PAL, L.PUT and R.PUT belong to the limbic network. Of note, these regions  
444 also show significant differences between NC and MCI/AD in terms of intra-regional E-I balance (Fig. 4) and  
445 total E-I balance (Fig. 12).

446

447

448

449

450

451

452

453

454

455

456

457

458

459

460

461

462

463

464

465

466

467

468

469

## 470 **Discussion**

471 Converging evidence suggests that E-I imbalance is a critical regulator of AD pathology (Palop and Mucke,  
472 2010; Busche and Konnerth, 2016; Palop and Mucke, 2016; Frere and Slutsky, 2018; Styr and Slutsky, 2018;  
473 Ambrad et al., 2019) and may represent a core element that underpins a “central feature” of AD by integrating  
474 pathophysiological findings from multi-levels of analysis (cell-circuit-network) (Maestú et al., 2021).  
475 Identifying pathological E-I balance during the progression of AD thus constitutes an important first step to  
476 developing new diagnostic techniques that use E-I imbalance as a biomarker and new treatment paradigms that  
477 aim to restore E-I balance. Our study provides both a novel framework to measure pathological E-I balance and  
478 important insights into the systematic features and circuit mechanisms of E-I alterations during the progression  
479 of AD.

### 480 **A multiscale neural modeling framework for E-I estimation**

481 Due to the inability of conventional fMRI to resolve excitatory versus inhibitory activities (Devor et al., 2007;  
482 Anenberg et al., 2015; Vazquez et al., 2018), a fMRI-based computational framework that could accurately  
483 estimate E-I imbalance during AD progression is urgently needed. As the two widely used approaches for  
484 generative modeling, DCM (Friston et al., 2003, 2014; Li et al., 2011) and BNM (Honey et al., 2007, 2009;  
485 Deco and Jirsa, 2012; Deco et al., 2013a, b) are limited in either the biophysical realism (DCM) or the ability to  
486 estimate individual connection strengths (BNM) (see review in Li and Yap, 2022). To overcome these  
487 limitations, we applied a recently developed MNMI framework (Li et al., 2019; 2021) to an ADNI dataset to  
488 identify disrupted E-I balance in a large network during AD progression. Results show that MNMI is capable of  
489 identifying impaired excitatory and inhibitory EC in MCI and AD, which can be harnessed to infer E-I  
490 imbalance at a mesoscale circuit level. The accuracy and reliability of MNMI are supported by the following  
491 observations: **(1)** E-I balance is more significantly impaired in AD than MCI, consistent with the more  
492 advanced disease stage of AD; **(2)** The brain regions that exhibit the most consistent and robust E-I alterations  
493 in MCI and AD (e.g., HCP and ACC) concur with their critical roles in AD pathophysiology (see below); and  
494 **(3)** E-I imbalance in multiple brain regions is found to be significantly correlated with cognitive impairments in  
495 MCI/AD, indicating that MNMI-derived E-I alterations are behaviorally meaningful and relevant. Thus, MNMI

496 provides a promising new tool to identify E-I imbalance in AD based on rs-fMRI.

#### 497 **Systematic features of E-I alterations**

498 One important hallmark of AD pathology is the progressive disruption of synaptic transmission (Sheng et al.,  
499 2012; Marsh and Alifragis, 2018). Consistently, we demonstrated that both excitatory and inhibitory  
500 interactions are substantially altered during the progress of AD and such alterations exhibit systematic features.  
501 First, excitatory and inhibitory connections are progressively disrupted during AD progression. For both intra-  
502 regional and inter-regional neural interactions, more connections are impaired in AD than MCI (when compared  
503 with NC) and the degree of impairments also becomes more significant in AD (Figs. 3, 8). As a result, E-I  
504 balance is also progressively impaired (Figs. 4, 9, 12), which is confirmed by linear model analysis (Figs. 5, 10,  
505 13). Second, AD pathology differentially alters excitatory and inhibitory connections. Compared with recurrent  
506 excitatory connections, more recurrent inhibitory connections are impaired and to a greater extent, in agreement  
507 with the emerging viewpoint of GABAergic dysfunction in AD (Li et al., 2016; Palop and Mucke, 2016; Xu et  
508 al., 2020). Importantly, alterations of inhibitory connections exhibit a more stable pattern than excitatory  
509 connections as consistent impairments are observed across MCI and AD (Fig. 3). Lastly, AD progression is  
510 associated with a general decoupling of excitatory and inhibitory interactions. Although the strength of  
511 excitatory and inhibitory connections could either increase or decrease in MCI/AD, a reduction of connection  
512 strength dominates for both intra-regional and inter-regional connections (Table 2, Figs. 3, 8 and 11), consistent  
513 with the “synaptic dismantling” theory of AD (Selkoe et al., 2002). The heterogenous but decrease-dominated  
514 alterations in excitatory and inhibitory coupling strengths (i.e., effective connectivity) also concord with the  
515 observed bidirectional changes yet widespread decrease in functional connectivity in MCI and AD (Filippi and  
516 Agosta, 2011; Brier et al., 2014; Dennis and Thompson, 2014).

#### 517 **Heterogenous alteration of E-I balance**

518 One important finding of this study is that we observed heterogenous, region-specific alteration of E-I balance.  
519 Depending on the specific modulation of excitatory and inhibitory connections, E-I difference can either  
520 increase or decrease for different brain regions. Our findings are consistent with experimental data that  
521 hyperactive neurons coexist with hypoactive neurons in an AD mouse model (Busche et al., 2008) and MCI and

AD are associated with both regional hyperactivation and hypoactivation in human (Celon et al., 2006; Corriveau-Lecavalier et al., 2019). We further revealed that increase of E-I difference is mostly due to a decrease of inhibitory connection strength (Figs. 3, 4), in agreement with experimental findings that neuronal hyperactivity is a result of decreased synaptic inhibition (Busche et al., 2008). Of note, studies have revealed that alteration of E-I balance depends on the stage of AD progression, where the HPC shows hyperactivity in early-stage aMCI, but reduced activity in late aMCI and AD (Dickerson et al., 2004, 2005; Celone et al., 2006). By comparison, our modeling results indicate that alterations in E-I balance remain consistent across MCI and AD for the same region and the (left) HCP exhibits reduced E-I difference throughout (Figs. 4, 9, 12). This may be due to the fact that elevated excitation in HPC is a temporal event in the early aMCI stage, similar to the transient increase of FC in the DMN and salience networks at the very mild AD phase (Brier et al., 2012).

### 532 **A core network of E-I imbalance in AD**

Despite the heterogeneous and distributed changes in E-I interactions, we observed consistent patterns of E-I disruptions in a set of brain regions including the HPC, pallidum, putamen, nucleus accumbens, inferior temporal cortex (ITC) and caudal anterior cingulate cortex (cACC). These brain regions were consistently impaired across MCI and AD for intra-regional E-I balance (Fig. 4), inter-regional E-I balance (Fig. 9) or overall E-I balance (Fig. 12) in our study. Such a core network highlights the paramount importance of the limbic/subcortical regions and cingulate areas in AD pathophysiology. The involvement of HPC, the core region in the memory network, is consistent with the vast majority of literature about the central role of this critical structure in AD (Dickerson et al., 2004, 2005; Wang et al., 2006; Palop et al., 2007; Bakker et al., 2012). The reduction of E-I difference in HPC due to increased inhibition is also consistent with the experimental findings that high GABA content in reactive astrocytes of the dentate gyrus was discovered in brain samples from human AD patients as well as AD mouse model resulting in increased tonic inhibition and memory deficit (Wu et al., 2014). The stable participation of the basal ganglia including pallidum, putamen and nucleus accumbens in E-I disruption is somewhat unexpected as the primary function of these subcortical structures is motor control (Groenewegen, 2003). However, recent MRI studies have consistently revealed substantial volume reduction in the basal ganglia of Alzheimer's patients, including the putamen and caudate nucleus (Cho

548 [et al., 2014](#); [de Jong et al., 2008, 2011](#)). The striatum, consisting of the putamen, nucleus accumbens and  
549 caudate nucleus, is particularly susceptible to AD degeneration since both A $\beta$  plaques and neurofibrillary  
550 tangles (NFT) of hyperphosphorylated tau are found in striatal regions ([Vitanova et al., 2019](#)) and A $\beta$  deposition  
551 starts in the striatum of presenilin-1 mutation carriers ([Klunk et al., 2007](#)). Importantly, A $\beta$  may begin to  
552 develop in the striatum 10 years before expected symptom onset ([Bateman et al., 2012](#)), suggesting that the  
553 basal ganglia could be an important pathophysiological target in AD.

554 The ITC plays a critical role in visual perception, object recognition, and semantic memory processing  
555 ([Ishai et al., 1999](#); [Herath et al., 2001](#); [Onitsuka et al., 2004](#)). Functional deficits in these cognitive processes  
556 have been well documented in patients with MCI and AD ([Hof and Bouras, 1991](#); [Giffard et al., 2001](#); [Laatu et](#)  
557 [al., 2003](#); [Uhlhaas et al., 2008](#)). It was observed that inferior temporal tau is associated with daily functional  
558 impairment in AD ([Halawa et al., 2019](#)). Disruption of E-I balance in ITC is consistent with the significant  
559 synaptic loss in this region in individuals with aMCI ([Scheff et al., 2011](#)), which may underlie early AD  
560 symptomatology. Lastly, the anterior cingulate cortex (ACC) plays a vital role in multiple cognitive processes  
561 including executive function, memory and emotion ([Carter et al., 1999](#); [Bush et al., 2000](#); [Weible et al., 2013](#)).  
562 It is one of the earliest affected areas by A $\beta$  accumulation ([Braak et al., 1991](#); [Raj et al., 2012](#)) and exhibits  
563 disrupted FC in MCI and AD ([Liang et al., 2015](#); [Liu et al., 2017](#)). It has been demonstrated that A $\beta$  alters E-I  
564 balance in ACC through inhibiting presynaptic GABA-release from fast-spiking interneurons onto pyramidal  
565 cells ([Ren et al., 2018](#)).

566 In addition to the above core AD network regions, the precuneus and PCC, the two central nodes in the  
567 DMN, show increased E-I difference in AD ([Figs. 4, 9, 12](#)) and their intra-regional E/I ratio is significantly  
568 correlated with cognitive performance as measured by the MMSE score ([Fig. 15](#)). As the main connectivity hub  
569 of DMN, the precuneus/PCC is involved in high-order cognitive functions such as emotion, arousal, self-  
570 consciousness, memory, and visuospatial processing ([Maddock et al., 2003](#); [Lou et al., 2004](#); [Cavanna and](#)  
571 [Trimble, 2006](#); [Wallentin et al., 2006](#); [Leech and Sharp, 2014](#)). It is one of the most salient areas of tau  
572 deposition and neuroinflammation ([Veitch et al., 2019](#)). Recent studies have indicated that involvement of the  
573 precuneus/PCC is significant for the development of AD ([Yokoi et al., 2018](#)) and magnetic stimulation of the



574 precuneus was shown to slow down cognitive and functional decline (Koch et al., 2022). Increased excitation in  
575 precuneus/PCC is consistent with task-induced deactivation deficits in DMN, a robust functional impairment in  
576 MCI and AD (Lustig et al., 2003; Greicius et al., 2004; Rombouts et al., 2005). Hence, the precuneus and PCC  
577 should be considered as extended components of the core AD network whose E-I imbalance underlies key  
578 pathological changes in AD.

### 579 **Model limitations**

580 One notable limitation of the current study is that we used DTI data from healthy HCP subjects (instead of  
581 NC/MCI/AD participants) to calculate SC, following the practice of a previous MNMI study (Li et al., 2021).  
582 Nevertheless, the impact of this limitation should be minimal since MNMI uses the average SC (from 100 HCP  
583 subjects) as a common base to constrain EC estimation (i.e., the EC is scaled by the SC which is the same for all  
584 subjects; Eqn. (1)). This average SC could mitigate the individual differences between HCP and NC/MCI/AD  
585 subjects. Also, the optimization of each individual EC parameter ( $W_{kj}$  in Eqn. (1)) can compensate for the  
586 potential SC difference between HCP and NC/MCI/AD subjects. Also, to remove false positive SC links and  
587 avoid over-parameterization, we estimated only 10% of the strongest inter-regional connections based on SC.  
588 We did not estimate more than 10% since it will substantially increase the number of free parameters in this  
589 large network which would reduce the estimation accuracy due to potential overfitting. Future improvement of  
590 MNMI may allow for the estimation of more EC parameters in a large-scale network.

### 591 **Conclusions**

592 Using a multiscale neural model inversion framework, we identified disrupted regional E-I balance as well as  
593 impaired excitatory and inhibitory neural interactions during AD progression. We observed that E-I balance is  
594 progressively disrupted from NC to MCI and to AD and alteration of E-I balance varies from region to region.  
595 Also, we found that inhibitory connections are more significantly impaired than excitatory connections and the  
596 strength of the majority of connections reduces in MCI and AD, leading to gradual decoupling of neural  
597 populations. Moreover, we revealed a core AD network comprised mainly of limbic and cingulate regions  
598 exhibit consistent and stable E-I alterations across MCI and AD, which may represent an early AD biomarker  
599 and an important therapeutic target to restore pathological E-I balance. Furthermore, we found that alterations in

600 regional E-I balance of the extended core AD network including the precuneus/PCC is behaviorally relevant by  
601 showing a significant correlation with the MMSE score.

602

603

604

605

606

607

608

609

610

611

612

613

614

615

616

617

618

619

## 620 **Methods**

### 621 **Overview of MNMI**

622 The schematic diagram of the MNMI framework is depicted in Fig. 1. The neural activity ( $x$ ) is generated by a  
623 neural mass network model (Wilson and Cowan, 1972) consisting of multiple brain regions (R1, R2, etc.). Each  
624 region contains one excitatory ( $E$ ) and one inhibitory ( $I$ ) neural populations with reciprocal connections and  
625 receives spontaneous input ( $u$ ). Different brain regions are connected via long-range fibers whose baseline  
626 strengths are determined by SC from diffusion MRI; the weak inter-regional connections are removed to avoid  
627 over-parameterization and superficial links (Li et al., 2021). The neural activity ( $x$ ) is converted to simulated  
628 BOLD signal ( $y$ ) via convolution with a hemodynamic response function (HRF, Friston et al., 1998) and  
629 simulated FC is computed. Both intra-regional recurrent excitation ( $W_{EE}$ ) and inhibition ( $W_{IE}$ ) weights and inter-  
630 regional connection strengths ( $W_{12}$ ,  $W_{21}$ , etc.) as well as the spontaneous input ( $u$ ) are estimated using genetic  
631 algorithm, a biologically inspired method for solving optimization problems based on natural selection  
632 (Mitchell, 1995), to minimize the difference between simulated and empirical FC.

### 633 **Subjects**

634 The rs-fMRI data was obtained from the ADNI dataset (<http://adni.loni.usc.edu/>). A total of 144 subjects with  
635 Mini-Mental State Examination (MMSE) scores were selected from the ADNI-Go and ADNI-2 studies,  
636 including 48 normal control (NC) (26/22 males/females, age  $73.4 \pm 6.5$  years, MMSE  $29.2 \pm 1.1$ ), 48 MCI  
637 (27/21 males/females, age  $73.9 \pm 10$  years, MMSE  $28 \pm 1.7$ ) and 48 AD subjects (27/21 males/females, age  
638  $73.6 \pm 8.6$  years, MMSE  $23.1 \pm 2.5$ ). All subjects were matched in terms of age ( $p = 0.95$ , one-way Analysis of  
639 Variance (ANOVA)) and gender ( $p = 0.55$ , one-way ANOVA).

### 640 **Image preprocessing**

641 Data quality control was implemented in ADNI to ensure consistency across imaging centers in terms of the  
642 scanner, imaging protocol, and signal-to-noise ratio (Jack Jr et al., 2008). The fMRI data (7 min, 140 volumes)  
643 was preprocessed using AFNI (Cox, 1997) according to a well-accepted pipeline (Yan and Zang, 2010), which  
644 includes first ten volumes removal, head motion correction, normalization, nuisance signals regression, detrend  
645 and bandpass filtering (0.01 to 0.08 Hz). Nuisance regressors include head motion parameters (the “Friston-24”

646 model), the mean BOLD signal of the white matter, and cerebrospinal fluid. To minimize artifacts due to  
647 excessive motion, the subjects with an average frame displacement (FD) (Power et al., 2014) greater than 0.5  
648 mm will be removed. Finally, fMRI data will be smoothed with 6 mm full width at half maximum (FWHM)  
649 Gaussian kernel and then nonlinearly registered to the Montreal Neurological Institutes (MNI) space.

### 650 **Functional and structural connectivity**

651 Regional averaged BOLD rs-fMRI time series were extracted using the Desikan-Killiany (DK) atlas (Desikan et  
652 al., 2006) with 84 regions of interest (ROIs). To reduce computational burden and focus on the networks that  
653 are most affected in AD (Zott et al., 2018), we selected 46 ROIs from the DMN, salience, executive control  
654 (frontoparietal control) and limbic networks (Table 1) based on Yeo's seven network definition (Yeo et al.,  
655 2011) and computed the individual FC matrix using Pearson's correlation. Structural connectivity was  
656 computed using probabilistic tractography based on the diffusion MRI data consisting of 100 unrelated subjects  
657 from the WU-Minn Human Connectome Project (HCP) young healthy adults, 1200 subjects release (Van Essen  
658 et al., 2013). The diffusion MRI data was preprocessed using the HCP protocol (Glasser et al., 2013). To  
659 compute SC, we conducted whole-brain tractography using asymmetry spectrum imaging (ASI) fiber tracking  
660 which fits a mixture of asymmetric fiber orientation distribution functions (AFODFs) to the diffusion signal  
661 (Wu et al., 2019, 2020). White matter streamlines were generated by successively following local directions  
662 determined from the AFODFs. The output streamlines were cropped at the grey/white-matter interface with a  
663 search distance of 2 mm, where the DK atlas was applied to obtain 84×84 SC matrix. The reduced SC matrix  
664 with 46 ROIs was extracted from the full SC matrix and averaged among the 100 subjects followed by  
665 normalization so the SC was bounded between 0 and 1. Finally, we selected the strongest 10% SC connections  
666 for network modeling and the weaker connections were removed (Frässle et al., 2017; Li et al., 2021).

### 667 **Neural mass model and hemodynamic response**

668 We employed computational neuronal modeling to capture the neural interactions and dynamics in the AD  
669 network. Regional brain dynamics are simulated by a neural mass model using the biologically motivated  
670 nonlinear Wilson-Cowan oscillator (Wilson and Cowan, 1972). The population-level activity of the  $j^{\text{th}}$  region is  
671 governed by the following equations (Abey Suriya et al., 2018; Li et al., 2011):

$$\tau_e \frac{dE_j(t)}{dt} = -E_j(t) + S\left(\sum_k W_{kj} C_{kj} E_k(t) + W_{EE}^j E_j(t) - W_{IE}^j I_j(t) + u + \varepsilon(t)\right) \quad (1)$$

$$\tau_i \frac{dI_j(t)}{dt} = -I_j(t) + S(W_{EI}^j E_j(t) + \varepsilon(t)) \quad (2)$$

where  $E_j$  and  $I_j$  are the mean firing rates of excitatory and inhibitory neural populations in brain region  $j$ ,  $\tau_e$  and  $\tau_i$  are the excitatory and inhibitory time constants (20 ms; [Hellyer et al., 2016](#)), and  $W_{EE}^j$ ,  $W_{IE}^j$  and  $W_{EI}^j$  are the local coupling strengths (i.e., recurrent excitation, recurrent inhibition and excitatory to inhibitory weight). The variable  $u$  is a constant spontaneous input and  $\varepsilon(t)$  is random additive noise following a normal distribution ([Deco et al., 2013a](#); [Wang et al., 2019](#)). The long-range connectivity strength from region  $k$  to region  $j$  is represented by  $W_{kj}$  which is scaled by empirical SC ( $C_{kj}$ ), and the nonlinear response function  $S$  is a sigmoid function  $S = 1/(1 + e^{-\frac{x-\mu}{\sigma}})$  ( $\mu=1.0$ ;  $\sigma=0.25$ ; [Abey Suriya et al., 2018](#)).

To increase computational efficiency, we replaced the hemodynamic state equations in the original MNMI model ([Li et al., 2021](#)) with the canonical HRF and computed the hemodynamic response as the convolution of regional neural activity and the HRF kernel ([Friston et al., 1998](#)):

$$h(t) = \frac{t^{\alpha_1-1} \beta_1^{\alpha_1} e^{-\beta_1 t}}{\Gamma(\alpha_1)} - c \frac{t^{\alpha_2-1} \beta_2^{\alpha_2} e^{-\beta_2 t}}{\Gamma(\alpha_2)} \quad (3)$$

where  $t$  indicates time,  $\alpha_1 = 6$ ,  $\alpha_2 = 16$ ,  $\beta_1 = \beta_2 = 1$ ,  $c = 1/6$ , and  $\Gamma$  represents the gamma function. The regional neural activity is calculated as the weighted sum of excitatory and inhibitory neural activity (i.e.,  $x_j = \frac{2}{3} E_j + \frac{1}{3} I_j$ ; [Becker et al., 2015](#); [Li et al., 2021](#)).

### Estimation of model parameters

Both local (intra-regional) and long-range (inter-regional) connection strengths in the model are estimated. For the local parameters, we estimated both recurrent excitation ( $W_{EE}$ ) and recurrent inhibition ( $W_{IE}$ ) weights in each ROI, resulting in 92 local parameters. The E→I coupling weight ( $W_{EI}$ ) was assumed to be constant (3.0; [Li et al., 2021](#)) as the effect of  $W_{EI}$  could be accommodated by change in  $W_{IE}$ . To avoid over-parameterization and false positive connections due to DTI noise ([Maier-Hein et al., 2017](#)), we estimated the strongest 10% inter-regional

694 connections ( $N = 212$ ) and removed the remaining weaker connections. In addition, the spontaneous input ( $u$ ) is  
695 estimated, which results in a total of 305 free parameters for estimation.

696 We used the genetic algorithm (GA; implemented by the *ga* function in MATLAB global optimization  
697 toolbox) to estimate the model parameters. The parameters are bounded within certain ranges to achieve balanced  
698 excitation and inhibition in the network (Li et al., 2021):  $W_{EE}$  and  $W_{IE} \in [2, 4]$ ,  $W_{ki} \in [-2, 2]$ , and  $u \in [0.2, 0.4]$ .  
699 GA maximizes the Pearson's correlation between the simulated and empirical FC matrices with the functional  
700 tolerance set to be  $1e-3$  and the maximal number of generations set to be 128. We observed good convergence  
701 within 128 generations for all the subjects.

## 702 Numerical integration

703 The differential equations of the neural mass model are simulated using the 4th order Runge-Kutta (RK) scheme  
704 with an integration step of 10 ms; a shorter integration step has no significant effect on the results reported. We  
705 simulated the network for a total of 200 sec, and the first 20 sec of the BOLD activity is discarded to remove  
706 transient effects. The remaining 180 sec time series are downsampled to 0.33 Hz to have the same temporal  
707 resolution as the empirical BOLD signal ( $TR = 3$  sec). The model along with the optimization procedure are  
708 coded in MATLAB and run in parallel with 24 cores in a high-performance UNC Linux computing cluster. The  
709 computing time (for each individual subject) ranges from 30 to 60 hours.

## 710 Metrics for E-I balance

711 Regional E-I balance is quantified by either E-I difference (sum of incoming excitatory EC – sum of incoming  
712 inhibitory EC) or E/I ratio (the ratio of the sum of incoming excitatory EC to the sum of incoming inhibitory  
713 EC). We defined three metrics of regional E-I balance: **(1)** intra-regional E-I balance; **(2)** inter-regional E-I  
714 balance; and **(3)** total E-I balance. The intra-regional E-I balance of each region is calculated as the difference  
715 (or ratio) between recurrent excitation and recurrent inhibition strength, while inter-regional E-I balance is  
716 computed as the difference between the sum of the incoming excitatory inter-regional EC and the sum of the  
717 incoming inhibitory inter-regional EC. We did not compute inter-regional E/I ratio because some regions  
718 receive excitatory or inhibitory EC only. The total E-I balance is calculated as the difference (or ratio) between

719 total excitation level (recurrent excitation strength + all incoming excitatory inter-regional EC) and total  
720 inhibition level (recurrent inhibition strength + all incoming inhibitory inter-regional EC) to a particular region.

### 721 **Statistical analysis**

722 Model parameters are estimated for each subject and compared between NC and MCI, NC and AD, and MCI  
723 and AD. We used two-sample *t*-tests to compare local and inter-regional connection strengths as well as intra-  
724 regional, inter-regional and total E-I balance. Multiple comparisons are corrected by the false discovery rate  
725 (FDR; [Benjamini and Yekutieli, 2001](#)) method except for the inter-regional EC which is corrected by the  
726 Network-based Statistics (NBS; [Zalesky et al., 2010](#)) approach, both at a significance level of  $p < 0.05$ .

### 727 **Data availability**

728 Both the ANDI data (<https://adni.loni.usc.edu/>) and HCP data (<https://www.humanconnectome.org/>) are  
729 publicly available. All structural and functional connectivity matrices along with BOLD fMRI time series are  
730 available from the GitHub repository (GITHUB\_LINK).

### 731 **Code availability**

732 The MATLAB codes that support the findings of this study are available from the GitHub repository given  
733 above.

734

735

736

737

738

739

740

741



742 **Acknowledgements**

743 This work was supported in part by the United States National Institutes of Health (NIH) (grant nos. EB008374,  
744 MH125479, and EB006733).

745

746 **Author contributions**

747 G.L. and P-T.Y. conceived and designed the study. G.L. developed the model, analyzed the data, interpreted the  
748 results and prepared the manuscript. L-M.H. and Y.W. conducted data acquisition and preprocessing. G.L.,  
749 A.C.B., Y-Y.I.S. and P-T.Y. discussed and revised the manuscript.

750

751 **Competing interests**

752 The authors declare no competing interests.

753

754

755 Correspondence and requests for materials should be addressed to Pew-Thian Yap.

756

757

758

759

760

761

762

763

764

765

766

767

768

769

770

## 771 **References**

- 772 Abey Suriya RG, Hadida J, Sotiropoulos SN, Jbabdi S, Becker R, Hunt BAE, et al. (2018) A biophysical model  
773 of dynamic balancing of excitation and inhibition in fast oscillatory large-scale networks. *PLoS Comput Biol*  
774 14: e1006007.
- 775 Aldehri M, Temel Y, Alnaami I, Jahanshahi A, Heschem S (2018) Deep brain stimulation for Alzheimer's  
776 disease: an update. *Surg Neurol Int* 9: 58.
- 777 Alzheimer's Association (2016) 2016 Alzheimer's disease facts and figures. *Alzheimer's Dement* 12: 459–509.
- 778 Ambrad Giovannetti E, Fuhrmann M (2019) Unsupervised excitation: GABAergic dysfunctions in Alzheimer's  
779 disease. *Brain Res* 1707: 216–226.
- 780 Anenberg, E, Chan AW, Xie Y, LeDue JM, Murphy TH (2015) Optogenetic stimulation of GABA neurons can  
781 decrease local neuronal activity while increasing cortical blood flow. *J Cereb Blood Flow Metab* 35: 1579–  
782 1586.
- 783 Badhwar A, Tam A, Dansereau C, Orban P, Hoffstaedter F, Bellec P (2017) Resting-state network dysfunction  
784 in Alzheimer's disease: A systematic review and meta-analysis. *Alzheimers Dement (Amst)* 8: 73-85.
- 785 Bakker A, Krauss GL, Albert MS, Speck CL, Jones LR, Stark CE, Yassa MA, Bassett SS, Shelton AL,  
786 Gallagher M (2012) Reduction of hippocampal hyperactivity improves cognition in amnesic mild cognitive  
787 impairment. *Neuron* 74: 467–474.
- 788 Bateman RJ, Xiong C, Benzinger TL, Fagan AM, Goate A, Fox NC, Marcus DS, Cairns NJ, Xie X, Blazey TM,  
789 Holtzman DM, Santacruz A, Buckles V, Oliver A, Moulder K, Aisen PS, Ghetti B, Klunk WE, McDade E,  
790 Martins RN, Masters CL, Mayeux R, Ringman JM, Rossor MN, Schofield PR, Sperling RA, Salloway S,  
791 Morris JC (2012) Dominantly Inherited Alzheimer Network. Clinical and biomarker changes in dominantly  
792 inherited Alzheimer's disease. *N Engl J Med* 367: 795-804.
- 793 Becker R, Knock S, Ritter P, Jirsa V (2015) Relating alpha power and phase to population firing and  
794 hemodynamic activity using a thalamo-cortical neural mass model. *PLoS Comput Biol* 11: e1004352.
- 795 Benjamini Y, Yekutieli D (2001) The control of the false discovery rate in multiple testing under dependency.  
796 *The Annals of Statistics* 29: 1165-1188.
- 797 Bero AW, Yan P, Roh JH, Cirrito JR, Stewart FR, Raichle ME, Lee JM, Holtzman DM (2011) Neuronal  
798 activity regulates the regional vulnerability to amyloid- $\beta$  deposition. *Nat Neurosci* 14: 750–756.

- 799 Braak H, Braak E (1991) Neuropathological staging of Alzheimer-related changes. *Acta Neuropathol* 82: 239–  
800 59.
- 801 Brier MR, Thomas JB, Ances BM (2014) Network dysfunction in Alzheimer's disease: refining the  
802 disconnection hypothesis. *Brain Connect* 4: 299-311.
- 803 Brier MR, Thomas JB, Snyder AZ, Benzinger TL, Zhang D, Raichle ME, Holtzman DM, Morris JC, Ances BM  
804 (2012) Loss of intranetwork and internetwork resting state functional connections with Alzheimer's disease  
805 progression. *J Neurosci* 32: 8890–8899.
- 806 Busche MA, Eichhoff G, Adelsberger H, Abramowski D, Wiederhold KH, Haass C, Staufenbiel M, Konnerth  
807 A, Garaschuk O (2008) Clusters of hyperactive neurons near amyloid plaques in a mouse model of  
808 Alzheimer's disease. *Science* 321: 1686–1689.
- 809 Busche MA, Kekus M, Adelsberger H, Noda T, Forstl H, Nelken I, Konnerth A (2015) Rescue of long range  
810 circuit dysfunction in Alzheimer's disease models. *Nat Neurosci* 18: 1623–1630.
- 811 Busche MA, Konnerth A (2016) Impairments of neural circuit function in Alzheimer's disease. *Philos Trans R*  
812 *Soc Lon B Biol Sci* 371: 20150429.
- 813 Bush G, Luu P, Posner MI (2000) Cognitive and emotional influences in anterior cingulate cortex. *Trends Cogn*  
814 *Sci* 4: 215–222.
- 815 Carter CS, Botvinick MM, Cohen JD (1999) The contribution of the anterior cingulate cortex to executive  
816 processes in cognition. *Rev Neurosci* 10: 49–57.
- 817 Cavanna AE, Trimble MR (2006) The precuneus: a review of its functional anatomy and behavioural correlates.  
818 *Brain* 129: 564–583.
- 819 Celone KA, Calhoun VD, Dickerson BC, Atri A, Chua EF, Miller SL, DePeau K, Rentz DM, Selkoe DJ,  
820 Blacker D, et al. (2006) Alterations in memory networks in mild cognitive impairment and Alzheimer's  
821 disease: an independent component analysis. *J Neurosci* 26: 10222–10231.
- 822 Cho H, Kim JH, Kim C, Ye BS, Kim HJ, Yoon CW, Seo SW (2014). Shape changes of the basal ganglia and  
823 thalamus in Alzheimer's disease: A three-year longitudinal study. *Journal of Alzheimer's Disease* 40: 285–  
824 295.
- 825 Cohen AD, Price JC, Weissfeld LA, James J, Rosario BL, Bi W, Nebes RD, Saxton JA, Snitz BE, Aizenstein  
826 HA, Wolk DA, Dekosky ST, Mathis CA, Klunk WE (2009) Basal cerebral metabolism may modulate the  
827 cognitive effects of A $\beta$  in mild cognitive impairment: an example of brain reserve. *J Neurosci* 29: 14770–  
828 14778.

- 829 Corriveau-Lecavalier N, Mellah S, Clément F, Belleville S (2019) Evidence of parietal hyperactivation in  
830 individuals with mild cognitive impairment who progressed to dementia: A longitudinal fMRI study.  
831 *Neuroimage Clin* 24: 101958.
- 832 Cox RW, Hyde JS (1997) Software tools for analysis and visualization of fMRI data. *NMR Biomed* 10: 171–  
833 178.
- 834 de Haan W, Mott K, van Straaten EC, Scheltens P, Stam CJ (2012) Activity dependent degeneration explains  
835 hub vulnerability in Alzheimer's disease. *PLoS Comput Biol* 8: e1002582.
- 836 de Haan W, van Straaten ECW, Gouw AA, Stam CJ (2017) Altering neuronal excitability to preserve network  
837 connectivity in a computational model of Alzheimer's disease. *PLoS Comput Biol* 13: e1005707.
- 838 de Jong LW, Ferrarini L, van der Grond J, Milles JR, Reiber JHC, Westendorp RGJ, ... van Buchem MA  
839 (2011) Shape abnormalities of the striatum in Alzheimer's disease. *Journal of Alzheimer's Disease*, 23: 49–  
840 59.
- 841 de Jong LW, van der Hiele K, Veer IM, Houwing JJ, Westendorp RGJ, Bollen ELEM, ... van der Grond J  
842 (2008) Strongly reduced volumes of putamen and thalamus in Alzheimer's disease: An MRI study. *Brain*  
843 131: 3277–3285.
- 844 Deco G, Jirsa VK (2012) Ongoing cortical activity at rest: criticality, multistability, and ghost attractors. *J*  
845 *Neurosci* 32: 3366-3375.
- 846 Deco G, Jirsa VK, McIntosh AR (2013a). Resting brains never rest: computational insights into potential  
847 cognitive architectures. *Trends Neurosci* 36, 268–274.
- 848 Deco G, Ponce-Alvarez A, Mantini D, Romani GL, Hagmann P, Corbetta M (2013b) Resting-state functional  
849 connectivity emerges from structurally and dynamically shaped slow linear fluctuations. *J Neurosci* 33:  
850 11239–11252.
- 851 Dennis EL, Thompson PMv (2014) Functional brain connectivity using fMRI in aging and Alzheimer's disease.  
852 *Neuropsychol Rev* 24: 49-62.
- 853 Desikan RS, Ségonne F, Fischl B, Quinn BT, Dickerson BC, Blacker D, Buckner RL, Dale AM, Maguire RP,  
854 Hyman BT, Albert MS, Killiany RJ (2006) An automated labeling system for subdividing the human  
855 cerebral cortex on MRI scans into gyral based regions of interest. *Neuroimage* 31: 968–980.
- 856 Devor A, Tian P, Nishimura N, Teng IC, Hillman EM, Narayanan SN, Ulbert I, Boas DA, Kleinfeld D, Dale  
857 AM (2007) Suppressed neuronal activity and concurrent arteriolar vasoconstriction may explain negative  
858 blood oxygenation level-dependent signal. *J Neurosci* 27: 4452–4459.

- 859 Dhanjal NS, Wise RJ (2014). Frontoparietal cognitive control of verbal memory recall in Alzheimer’s disease.  
860 *Ann Neurol* 76: 241–251.
- 861 Dickerson BC, Salat DH, Bates JF, Atiya M, Killiany RJ, Greve DN, Dale AM, Stern CE, Blacker D, Albert  
862 MS, Sperling RA (2004) Medial temporal lobe function and structure in mild cognitive impairment. *Ann*  
863 *Neurol* 56: 27–35.
- 864 Dickerson BC, Salat DH, Greve DN, Chua EF, Rand-Giovannetti E, Rentz DM, Bertram L, Mullin K, Tanzi  
865 RE, Blacker D, et al. (2005) Increased hippocampal activation in mild cognitive impairment compared to  
866 normal aging and AD. *Neurology* 65: 404–411.
- 867 Filippi M, Agosta F (2011) Structural and functional network connectivity breakdown in Alzheimer’s disease  
868 studied with magnetic resonance imaging techniques. *J Alzheimers Dis* 24: 455-474.
- 869 Frässle S, Lomakina EI, Razi A, Friston KJ, Buhmann JM, Stephan KE (2017) Regression DCM for fMRI.  
870 *Neuroimage* 155: 406–421.
- 871 Frere S, Slutsky I (2018) Alzheimer's disease: from firing instability to homeostasis network collapse. *Neuron*  
872 97: 32–58.
- 873 Friston KJ (2011) Functional and effective connectivity: a review. *Brain Connect* 1: 13–36.
- 874 Friston K, Fletcher P, Josephs O, Holmes A, Rugg M, Turner R (1998) Event-related fMRI: characterizing  
875 differential responses. *Neuroimage* 7: 30–40.
- 876 Friston KJ, Harrison L, Penny W (2003) Dynamic causal modeling. *Neuroimage* 19: 1273–1302.
- 877 Friston KJ, Kahan J, Biswal B, Razi AA (2014) A DCM for resting state fMRI. *Neuroimage* 94: 396–407.
- 878 Giffard B, Desgranges B, Nore-Mary F, Lalevée C, de la Sayette V, Pasquier F, Eustache F (2001) The nature  
879 of semantic memory deficits in Alzheimer's disease: new insights from hyperpriming effects. *Brain* 124:  
880 1522-1532.
- 881 Glasser MF, Sotiropoulos SN, Wilson JA, Coalson TS, Fischl B, Andersson JL, Xu J, Jbabdi S, Webster M,  
882 Polimeni JR, Van Essen DC, Jenkinson M; WU-Minn HCP Consortium (2013) The minimal preprocessing  
883 pipelines for the Human Connectome Project. *Neuroimage* 80: 105-24.
- 884 Glover GH (2011) Overview of functional magnetic resonance imaging. *Neurosurg Clin N Am* 22: 133-139.
- 885 Greicius MD, Srivastava G, Reiss AL, Menon V (2004) Default-mode network activity distinguishes  
886 Alzheimer’s disease from healthy aging: evidence from functional MRI. *Proc Natl Acad Sci USA* 101:  
887 4637–4642.

- 888 Groenewegen HJ (2003) The basal ganglia and motor control. *Neural Plast* 10: 107-120.
- 889 Halawa OA, Gatchel JR, Amariglio RE et al. (2019) Inferior and medial temporal tau and cortical amyloid are  
890 associated with daily functional impairment in Alzheimer's disease. *Alz Res Therapy* 11: 14.
- 891 Hellyer PJ, Jachs B, Clopath C, Leech R (2016) Local inhibitory plasticity tunes macroscopic brain dynamics  
892 and allows the emergence of functional brain networks. *Neuroimage* 124: 85–95.
- 893 Herath P, Kinomura S, Roland PE (2001) Visual recognition: evidence for two distinctive mechanisms from a  
894 PET study. *Hum Brain Mapp* 12: 110–119.
- 895 Hof PR, Bouras C (1991) Object recognition deficit in Alzheimer's disease: possible disconnection of the  
896 occipito-temporal component of the visual system. *Neurosci Lett* 122: 53-56.
- 897 Honey CJ, Kötter R, Breakspear M, Sporns O (2007) Network structure of cerebral cortex shapes functional  
898 connectivity on multiple time scales. *Proc Natl Acad Sci USA* 104: 10240–10245.
- 899 Honey CJ, Sporns O, Cammoun L, Gigandet X, Thiran JP, Meuli R, Hagmann P (2009) Predicting human  
900 resting-state functional connectivity from structural connectivity. *Proc Natl Acad Sci USA* 106: 2035-2040.
- 901 Huang Y, Mucke L (2012) Alzheimer mechanisms and therapeutic strategies. *Cell* 148: 1204–1222.
- 902 Hughes SW, Crunelli V (2005) Thalamic mechanisms of EEG alpha rhythms and their pathological  
903 implications. *Neuroscientist* 11: 357-372.
- 904 Ishai A, Ungerleider LG, Martin A, Haxby JV (1999) Distributed representation of objects in the human ventral  
905 visual pathway. *Proc Natl Acad Sci USA* 96: 9379–9384.
- 906 Jack CR Jr, Bernstein MA, Fox NC, Thompson P, Alexander G, Harvey D, Borowski B, Britson PJ, L Whitwell  
907 J, Ward C, Dale AM, Felmlee JP, Gunter JL, Hill DL, Killiany R, Schuff N, Fox-Bosetti S, Lin C,  
908 Studholme C, DeCarli CS, Krueger G, Ward HA, Metzger GJ, Scott KT, Mallozzi R, Blezek D, Levy J,  
909 Debbs JP, Fleisher AS, Albert M, Green R, Bartzokis G, Glover G, Mugler J, Weiner MW (2008) The  
910 Alzheimer's Disease Neuroimaging Initiative (ADNI): MRI methods. *J Magn Reson Imaging* 27: 685-691.
- 911 Johnson SC, Christian BT, Okonkwo OC, Oh JM, Harding S, Xu G, et al. (2014) Amyloid burden and neural  
912 function in people at risk for Alzheimer's disease. *Neurobiol Aging* 35: 576–584.
- 913 Karran E, Mercken M, De Strooper B (2011) The amyloid cascade hypothesis for Alzheimer's disease: an  
914 appraisal for the development of therapeutics. *Nat Rev Drug Discov* 10: 698–712.

- 915 Klunk WE, Price JC, Mathis CA, Tsopelas ND, Lopresti BJ, Ziolko SK, DeKosky ST (2007). Amyloid  
916 deposition begins in the striatum of presenilin-1 mutation carriers from two unrelated pedigrees. *Journal of*  
917 *Neuroscience* 27: 6174–6184.
- 918 Koechlin E, Summerfield C (2007) An information theoretical approach to prefrontal executive function.  
919 *Trends Cogn Sci* 1: 229-235.
- 920 Koch G, Casula EP, Bonni S, Borghi I, Assogna M, Minei M, Pellicciari MC, Motta C, D'Acunto A, Porrazzini  
921 F, Maiella M, Ferrari C, Caltagirone C, Santarnecchi E, Bozzali M, Martorana A (2022) Precuneus  
922 magnetic stimulation for Alzheimer's disease: a randomized, sham-controlled trial. *Brain* 145: 3776-3786.
- 923 Laatu S, Revonsuo A, Jäykkä H, Portin R, Rinne JO (2003) Visual object recognition in early Alzheimer's  
924 disease: deficits in semantic processing. *Acta Neurol Scand* 108: 82-89.
- 925 Leech R, Sharp DJ (2014) The role of the posterior cingulate cortex in cognition and disease. *Brain* 137: 12–32.
- 926 Li B, Daunizeau J, Stephan KE, Penny W, Hu D, Friston K (2011) Generalised filtering and stochastic DCM for  
927 fMRI. *Neuroimage* 58: 442-457.
- 928 Li G, Liu Y, Zheng Y, Wu Y, Li D, Liang X, Chen Y, Cui Y, Yap P, Qiu S, Zhang H, Shen D (2021) Multiscale  
929 neural modeling of resting-state fMRI reveals executive-limbic malfunction as a core mechanism in major  
930 depressive disorder. *Neuroimage: Clinical* 31: 102758.
- 931 Li G, Liu Y, Zheng Y, Wu Y, Yap P, Qiu S, Zhang H, Shen D (2019) Identification of abnormal circuit  
932 dynamics in major depressive disorder via multiscale neural modeling of resting-state fMRI. In: Shen D. et  
933 al. (eds) *Medical Image Computing and Computer Assisted Intervention – MICCAI*. Lecture Notes in  
934 Computer Science, vol 11766. Springer, Cham.
- 935 Li G, Yap P-T (2022) From descriptive connectome to mechanistic connectome: Generative modeling in  
936 functional magnetic resonance imaging analysis. *Front Hum Neurosci* 16: 940842.
- 937 Li K, Guo L, Nie J, Li G, Liu T (2009) Review of methods for functional brain connectivity detection using  
938 fMRI. *Comput Med Imaging Graph* 33: 131–139.
- 939 Li Y, Sun H, Chen Z, Xu H, Bu G and Zheng H (2016) Implications of GABAergic neurotransmission in  
940 Alzheimer's Disease. *Front Aging Neurosci* 8: 31.
- 941 Liang Y, Chen Y, Li H, Zhao T, Sun X, Shu N, Peng D, Zhang Z (2015) Disrupted functional connectivity  
942 related to differential degeneration of the cingulum bundle in mild cognitive impairment patients. *Curr*  
943 *Alzheimer Res* 12: 255-265.



- 944 Liu X, Chen W, Hou H, Chen X, Zhang J, Liu J, Guo Z, Bai G (2017) Decreased functional connectivity  
945 between the dorsal anterior cingulate cortex and lingual gyrus in Alzheimer's disease patients with  
946 depression. *Behav Brain Res* 326: 132-138.
- 947 Lou HC, Luber B, Crupain M, Keenan JP, Nowak M, Kjaer TW, Sackeim HA, Lisanby SH (2004) Parietal  
948 cortex and representation of the mental Self. *Proc Natl Acad Sci USA* 101: 6827-6832.
- 949 Lustig C, Snyder AZ, Bhakta M, O'Brien KC, McAvoy M, Raichle ME, Morris JC, Buckner RL (2003)  
950 Functional deactivations: change with age and dementia of the Alzheimer type. *Proc Natl Acad Sci USA*  
951 100: 14504–14509.
- 952 Maddock RJ, Garrett AS, Buonocore MH (2003) Posterior cingulate cortex activation by emotional words:  
953 fMRI evidence from a valence decision task. *Human brain mapping* 18: 30–41.
- 954 Maestú F, de Haan W, Busche MA, DeFelipe J (2021) Neuronal excitation/inhibition imbalance: core element  
955 of a translational perspective on Alzheimer pathophysiology. *Ageing Res Rev* 69: 101372.
- 956 Marsh J, Alifragis P (2018) Synaptic dysfunction in Alzheimer's disease: the effects of amyloid beta on synaptic  
957 vesicle dynamics as a novel target for therapeutic intervention. *Neural Regen Res* 13: 616-623.
- 958 Maier-Hein KH, Neher PF, Houde JC, et al. (2017) The challenge of mapping the human connectome based on  
959 diffusion tractography. *Nat Commun* 8: 1349.
- 960 Menon V (2011) Large-scale brain networks and psychopathology: a unifying triple network model. *Trends*  
961 *Cogn Sci* 15: 483-506.
- 962 Miller EK, Cohen JD (2001) An integrative theory of prefrontal cortex function. *Annu Rev Neurosci* 24: 167-  
963 202.
- 964 Mitchell M (1995) Genetic algorithms: an overview. *Complexity* 1: 31–39.
- 965 Mormino EC, Brandel MG, Madison CM, Marks S, Baker SL, Jagust WJ (2012) A $\beta$  deposition in aging is  
966 associated with increases in brain activation during successful memory encoding. *Cereb Cortex* 22: 1813–  
967 1823.
- 968 Nitsch RM, Farber SA, Growdon JH, Wurtman RJ (1993) Release of amyloid beta- protein precursor  
969 derivatives by electrical depolarization of rat hippocampal slices. *Proc Natl Acad Sci USA* 90: 5191–5193.
- 970 Onitsuka T, Shenton ME, Salisbury DF, Dickey CC, Kasai K, Toner SK, Frumin M, Kikinis R, Jolesz FA,  
971 McCarley RW (2004) Middle and inferior temporal gyrus gray matter volume abnormalities in chronic  
972 schizophrenia: an MRI study. *Am J Psychiatry* 161: 1603-1611.

- 973 Palop JJ, Chin J, Roberson ED, Wang J, Thwin MT, Bien-Ly N, Yoo J, Ho KO, Yu GQ, Kreitzer A, Finkbeiner  
974 S, Noebels JL, Mucke L (2007) Aberrant excitatory neuronal activity and compensatory remodeling of  
975 inhibitory hippocampal circuits in mouse models of Alzheimer's disease. *Neuron* 55: 697–711.
- 976 Palop JJ, Mucke L (2009) Epilepsy and cognitive impairments in Alzheimer's disease. *Archives of Neurology*  
977 66: 435–440.
- 978 Palop JJ, Mucke L (2010) Amyloid- $\beta$ -induced neuronal dysfunction in Alzheimer's disease: from synapses  
979 toward neural networks. *Nat Neurosci* 13: 812–818.
- 980 Palop J, Mucke L (2016) Network abnormalities and interneuron dysfunction in Alzheimer's disease. *Nat Rev*  
981 *Neurosci* 17: 777–792.
- 982 Petrides M (2005) Lateral prefrontal cortex: architectonic and functional organization. *Philos Trans R Soc Lond*  
983 *B: Biol Sci* 360: 781–795.
- 984 Power JD, Barnes KA, Snyder AZ, Schlaggar BL, Petersen SE (2012) Spurious but systematic correlations in  
985 functional connectivity MRI networks arise from subject motion. *Neuroimage* 59: 2142–2154.
- 986 Preti MG, Bolton TA, Van De Ville D (2017) The dynamic functional connectome: State-of-the-art and  
987 perspectives. *Neuroimage* 160: 41–54.
- 988 Raj A, Kuceyeski A, Weiner M (2012) A network diffusion model of disease progression in dementia. *Neuron*  
989 73: 1204–1215.
- 990 Ren SQ, Yao W, Yan JZ, Jin C, Yin JJ, Yuan J, Yu S, Cheng Z (2018) Amyloid  $\beta$  causes excitation/inhibition  
991 imbalance through dopamine receptor 1-dependent disruption of fast-spiking GABAergic input in anterior  
992 cingulate cortex. *Sci Rep* 8: 302.
- 993 Rombouts SA, Barkhof F, Goekoop R, Stam CJ, Scheltens P (2005) Altered resting state networks in mild  
994 cognitive impairment and mild Alzheimer's disease: an fMRI study. *Hum Brain Mapp* 26: 231–239.
- 995 Scheff SW, Price DA, Schmitt FA, Scheff MA, Mufson EJ (2011) Synaptic loss in the inferior temporal gyrus  
996 in mild cognitive impairment and Alzheimer's disease. *J Alzheimers Dis* 24: 547–557.
- 997 Schultz AP, Chhatwal JP, Hedden T, Mormino EC, Hanseeuw BJ, Sepulcre J, Huijbers W, LaPoint M, Buckley  
998 RF, Johnson KA, Sperling RA (2017) Phases of hyperconnectivity and hypoconnectivity in the default  
999 mode and salience networks track with amyloid and tau in clinically normal individuals. *J Neurosci* 37:  
1000 4323–4331.
- 1001 Selkoe DJ (2002) Alzheimer's disease is a synaptic failure. *Science* 298: 789–791.

- 1002 Sheng M, Sabatini BL, Südhof TC (2012) Synapses and Alzheimer's disease. *Cold Spring Harb Perspect Biol*  
1003 4: a005777.
- 1004 Sporns O (2014) Contributions and challenges for network models in cognitive neuroscience. *Nat Neurosci* 17:  
1005 652–660.
- 1006 Stephan KE, Iglesias S, Heinzle J, Diaconescu AO (2015) Translational perspectives for computational  
1007 neuroimaging. *Neuron* 87: 716–732.
- 1008 Styr B, Slutsky I (2018) Imbalance between firing homeostasis and synaptic plasticity drives early-phase  
1009 Alzheimer's disease. *Nat Neurosci* 21: 463–473.
- 1010 Thakur AK, Kamboj P, Goswami K (2018) Pathophysiology and management of Alzheimer's disease: an  
1011 overview. *J Anal Pharm Res* 9: 226–235.
- 1012 Tiwari S, Atluri V, Kaushik A, Yndart A, Nair M (2019) Alzheimer's disease: pathogenesis, diagnostics, and  
1013 therapeutics. *Int J Nanomedicine* 14: 5541–5554.
- 1014 Tong Y, Hocke LM, Frederick BB (2019) Low frequency systemic hemodynamic “noise” in resting state  
1015 BOLD fMRI: characteristics, causes, implications, mitigation Strategies, and applications. *Front Neurosci*  
1016 13: 787.
- 1017 Uhlhaas PJ, Pantel J, Lanfermann H, Prvulovic D, Haenschel C, Maurer K, Linden DE (2008) Visual perceptual  
1018 organization deficits in Alzheimer's dementia. *Dement Geriatr Cogn Disord* 25: 465-475.
- 1019 Uhlirova H, Kiliç K, Tian P, Thunemann M, Desjardins M, Saisan PA et al. (2016) Cell type specificity of  
1020 neurovascular coupling in cerebral cortex. *Elife* 5: e14315.
- 1021 Van Essen DC, Smith SM, Barch DM, Behrens TEJ, Yacoub E, Ugurbil K, WU-Minn HCP Consortium (2013)  
1022 The WU-Minn human connectome project: An overview. *Neuroimage* 80: 62–79.
- 1023 van Nifterick AM, Gouw AA, van Kesteren RE et al. (2022) A multiscale brain network model links  
1024 Alzheimer's disease-mediated neuronal hyperactivity to large-scale oscillatory slowing. *Alz Res Therapy* 14:  
1025 101.
- 1026 Vazquez AL, Fukuda M, Kim SG (2018) Inhibitory neuron activity contributions to hemodynamic responses  
1027 and metabolic load examined using an inhibitory optogenetic mouse model. *Cereb Cortex* 28: 4105-4119.
- 1028 Verret L, Mann EO, Hang GB, Barth AM, Cobos I, Ho K, Devidze N, Masliah E, Kreitzer AC, Mody I, Mucke  
1029 L, Palop JJ (2012) Inhibitory interneuron deficit links altered network activity and cognitive dysfunction in  
1030 Alzheimer model. *Cell* 149: 708–721.

- 1031 Vitanova KS, Stringer KM, Benitez DP, Brenton J, Cummings DM (2019) Dementia associated with disorders  
1032 of the basal ganglia. *J Neurosci Res* 97: 1728-1741.
- 1033 Veitch DP, Weiner MW, Aisen PS, et al. (2019) Understanding disease progression and improving Alzheimer's  
1034 disease clinical trials: recent highlights from the Alzheimer's disease neuroimaging initiative. *Alzheimers*  
1035 *Dement* 15: 106–152.
- 1036 Wallentin M, Roepstorff A, Glover R, Burgess N (2006) Parallel memory systems for talking about location  
1037 and age in precuneus, caudate and Broca's region. *Neuroimage* 32: 1850–1864.
- 1038 Wang L, Zang Y, He Y, Liang M, Zhang X, Tian L, Wu T, Jiang T, Li K (2006) Changes in hippocampal  
1039 connectivity in the early stages of Alzheimer's disease: evidence from resting state fMRI. *Neuroimage*  
1040 31:496–504.
- 1041 Wang P, Kong R, Kong X, Liégeois R, Orban C, Deco G, van den Heuvel MP, Thomas Yeo BT (2019)  
1042 Inversion of a large-scale circuit model reveals a cortical hierarchy in the dynamic resting human brain. *Sci*  
1043 *Adv* 5: eaat7854.
- 1044 Weible AP (2013) Remembering to attend: the anterior cingulate cortex and remote memory. *Behav Brain Res*  
1045 245: 63–75.
- 1046 Wilson HR, Cowan JD (1972) Excitatory and inhibitory interactions in localized populations of model neurons.  
1047 *Biophys J* 12: 1–24.
- 1048 Wu Y, Lin W, Shen D, Yap PT and UNC/UMN Baby Connectome Project Consortium (2019) Asymmetry  
1049 spectrum imaging for baby diffusion tractography. In *International Conference on Information Processing*  
1050 *in Medical Imaging* (pp. 319-331). Springer, Cham.
- 1051 Wu Y, Hong Y, Feng Y, Shen D, Yap PT (2020) Mitigating gyral bias in cortical tractography via asymmetric  
1052 fiber orientation distributions. *Medical Image Analysis* 59: 101543.
- 1053 Wu Z, Guo Z, Gearing M, Chen G (2014) Tonic inhibition in dentate gyrus impairs long-term potentiation and  
1054 memory in an Alzheimer's disease model. *Nat Commun* 5: 4159
- 1055 Xu Y, Zhao M, Han Y, Zhang H (2020) GABAergic inhibitory interneuron deficits in Alzheimer's disease:  
1056 implications for treatment. *Front Neurosci* 14: 660.
- 1057 Yan CG, Zang YF (2010) DPARSF: A MATLAB Toolbox for "Pipeline" Data Analysis of Resting-State fMRI.  
1058 *Front Syst Neurosci* 4:13.

- 1059 Yeo BT, Krienen FM, Sepulcre J, Sabuncu MR, Lashkari D, Hollinshead M, et al. (2011) The organization of  
1060 the human cerebral cortex estimated by intrinsic functional connectivity. *J Neurophysiol* 106: 1125–1165.
- 1061 Yokoi T, Watanabe H, Yamaguchi H, Bagarinao E, Masuda M, Imai K, Ogura A, Ohdake R, Kawabata K, Hara  
1062 K, Riku Y, Ishigaki S, Katsuno M, Miyao S, Kato K, Naganawa S, Harada R, Okamura N, Yanai K,  
1063 Yoshida M and Sobue G (2018) Involvement of the precuneus/posterior cingulate cortex is significant for  
1064 the development of Alzheimer's disease: A PET (THK5351, PiB) and resting fMRI study. *Front Aging*  
1065 *Neurosci* 10: 304.
- 1066 Yuan P, Grutzendler J (2016) Attenuation of b-amyloid deposition and neurotoxicity by chemogenetic  
1067 modulation of neural activity. *J Neurosci* 36: 632–641.
- 1068 Zalesky A, Fornito A, Bullmore ET (2010) Network-based statistic: identifying differences in brain networks.  
1069 *Neuroimage* 53: 1197-1207.
- 1070 Zimmermann J, Perry A, Breakspear M, Schirner M, Sachdev P, Wen W, Kochan NA, Mapstone M, Ritter P,  
1071 McIntosh AR, Solodkin A (2018) Differentiation of Alzheimer's disease based on local and global  
1072 parameters in personalized Virtual Brain models. *Neuroimage Clin* 19: 240-251.
- 1073 Zott B, Busche MA, Sperling RA, Konnerth A (2018) What happens with the circuit in Alzheimer's disease in  
1074 mice and humans? *Annu Rev Neurosci* 41: 277-297.

1075  
1076  
1077  
1078  
1079  
1080  
1081  
1082  
1083  
1084  
1085  
1086
